# Supplementary material for: PhI(OAc)2 mediated decarboxylative sulfonylation of β-aryl-α,β-unsaturated carboxylic acids: a synthesis of (E)-vinyl sulfones
Source: Royal Society of Chemistry journal article supplement (doi:10.1039/c5ob00417a), 2015-01-01

## Supplementary Information

**PhI(OAc)<sub>2</sub> mediated decarboxylative sulfonylation of  $\beta$ -aryl- $\alpha,\beta$ -unsaturated carboxylic acids:**

**A synthesis of (*E*)-vinyl sulfones**

Praewpan Katrun,<sup>a</sup> Sornsiri Hlekhlai,<sup>a</sup> Jatuporn Meesilp,<sup>a</sup> Manat Pohmakotr,<sup>a</sup> Vichai Reutrakul,<sup>a</sup>  
Thaworn Jaipetch,<sup>b</sup> Darunee Soorukram<sup>a</sup> and Chutima Kuhakarn<sup>\*a</sup>

<sup>a</sup>*Department of Chemistry and Center of Excellence for Innovation in Chemistry (PERCH-CIC),  
Faculty of Science, Mahidol University, Rama 6 Road, Bangkok 10400, Thailand.*

<sup>b</sup>*Mahidol University and Center of Excellence for Innovation in Chemistry (PERCH-CIC),  
Kanchanaburi Campus, Saiyok, Kanchanaburi 71150, Thailand.*

E-mail: chutima.kon@mahidol.ac.th

### Contents

|                                                                                                                        |        |
|------------------------------------------------------------------------------------------------------------------------|--------|
| General information                                                                                                    | S2     |
| General procedure for the decarboxylative sulfonylation of $\beta$ -aryl- $\alpha,\beta$ -unsaturated carboxylic acids | S2     |
| <sup>1</sup> H and <sup>13</sup> C NMR spectra of products                                                             | S3-S35 |

**General information**

All isolated compounds were characterized on the basis of  $^1\text{H}$  NMR and  $^{13}\text{C}$  NMR spectroscopic data, IR spectra, and HRMS data.  $^1\text{H}$  NMR and  $^{13}\text{C}$  NMR spectra were recorded on a Bruker Ascend<sup>TM</sup> spectrometer.  $^1\text{H}$  NMR and  $^{13}\text{C}$  NMR chemical shifts are reported in ppm using tetramethylsilane (TMS) as an internal standard or residual nondeuterated solvent peak as an internal standard. Infrared spectra were recorded with a Bruker ALPHA FT-IR spectrometer. High-resolution mass spectra (HRMS) were recorded with a Bruker micro TOF spectrometer in the ESI mode. Melting points were recorded with a Sanyo Gallenkamp apparatus. Reactions were monitored by thin-layer chromatography and visualized by UV and a solution of  $\text{KMnO}_4$ . Cinnamic acids **1a**, **1g**, **1j**, **1k**, **1n**, **1q** and solvents were obtained from commercial sources and used without further purification. Unless otherwise noted,  $\alpha,\beta$ -unsaturated carboxylic acid were synthesized according to literature procedures via Wittig reaction and Horner-Wadsworth-Emmons reaction. Purification of the reaction products was carried out by column chromatography on silica gel (0.063–0.200 mm). After column chromatography, analytically pure solid was obtained by crystallization from  $\text{CH}_2\text{Cl}_2$ –hexanes.

**General procedures: Synthesis of vinyl sulfone from  $\beta$ -aryl- $\alpha,\beta$ -unsaturated carboxylic acid and sodium sulfinite.** DIB (161.1 mg, 0.50 mmol) was added to a solution of  $\beta$ -aryl- $\alpha,\beta$ -unsaturated carboxylic acid (0.25 mmol) and sodium sulfinite (1.0 mmol) in DMF (3 mL) at room temperature and then reaction mixture was stirred at 100 °C under air for 10-30 minutes. After completion of the reaction, the reaction was cooled to room temperature and was diluted with water (10 mL). Further stirring was followed by extraction with EtOAc (2  $\times$  20 mL). The combined organic extracts were washed with  $\text{H}_2\text{O}$  (20 mL) and brine (20 mL), dried ( $\text{MgSO}_4$ ), filtered, and concentrated (aspirator). The residue was purified by column chromatography using EtOAc–hexanes as eluent to afford the corresponding product.

**$^1\text{H}$  and  $^{13}\text{C}$  NMR spectra**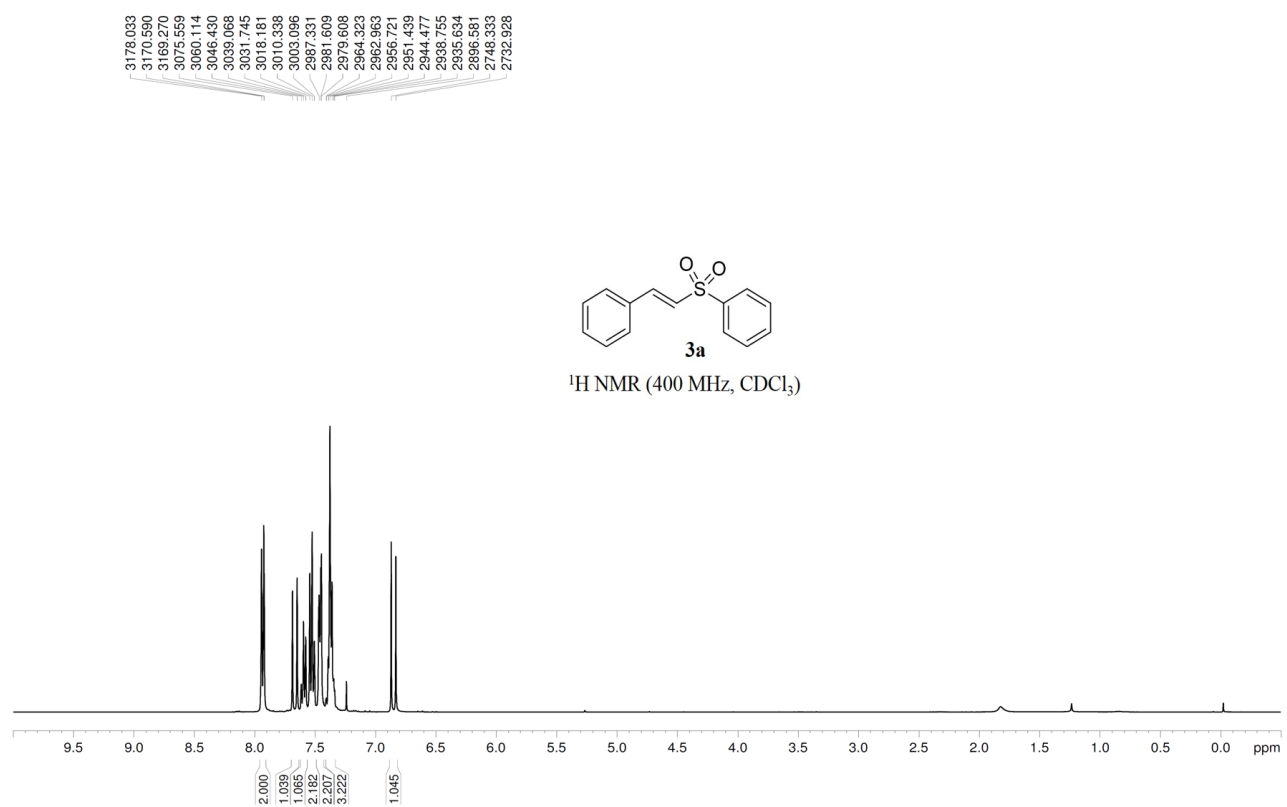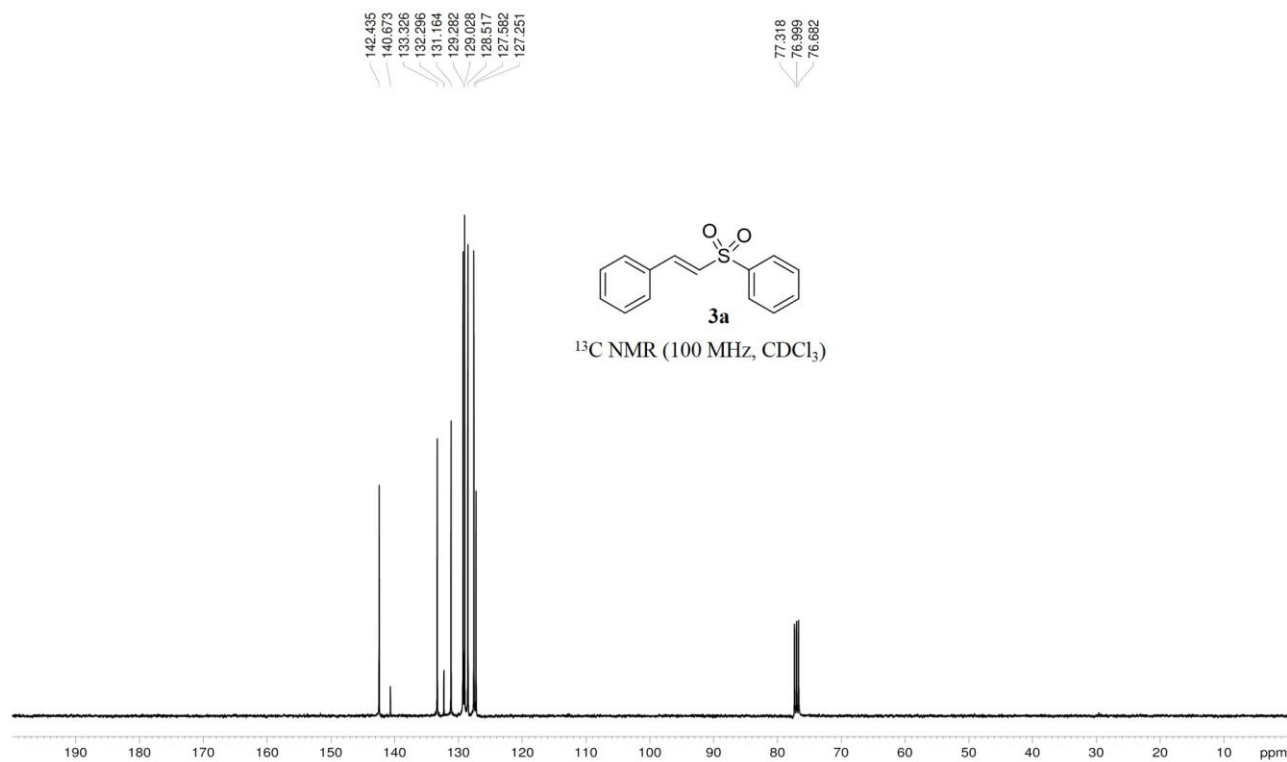

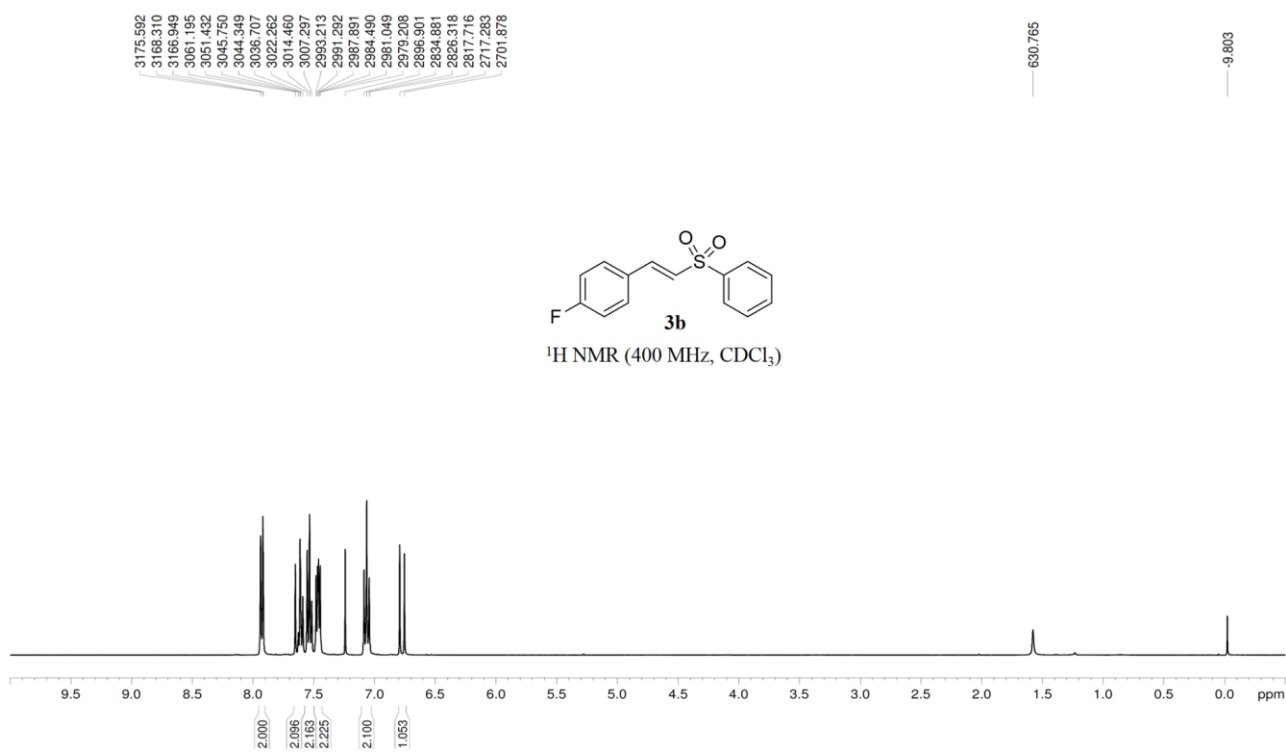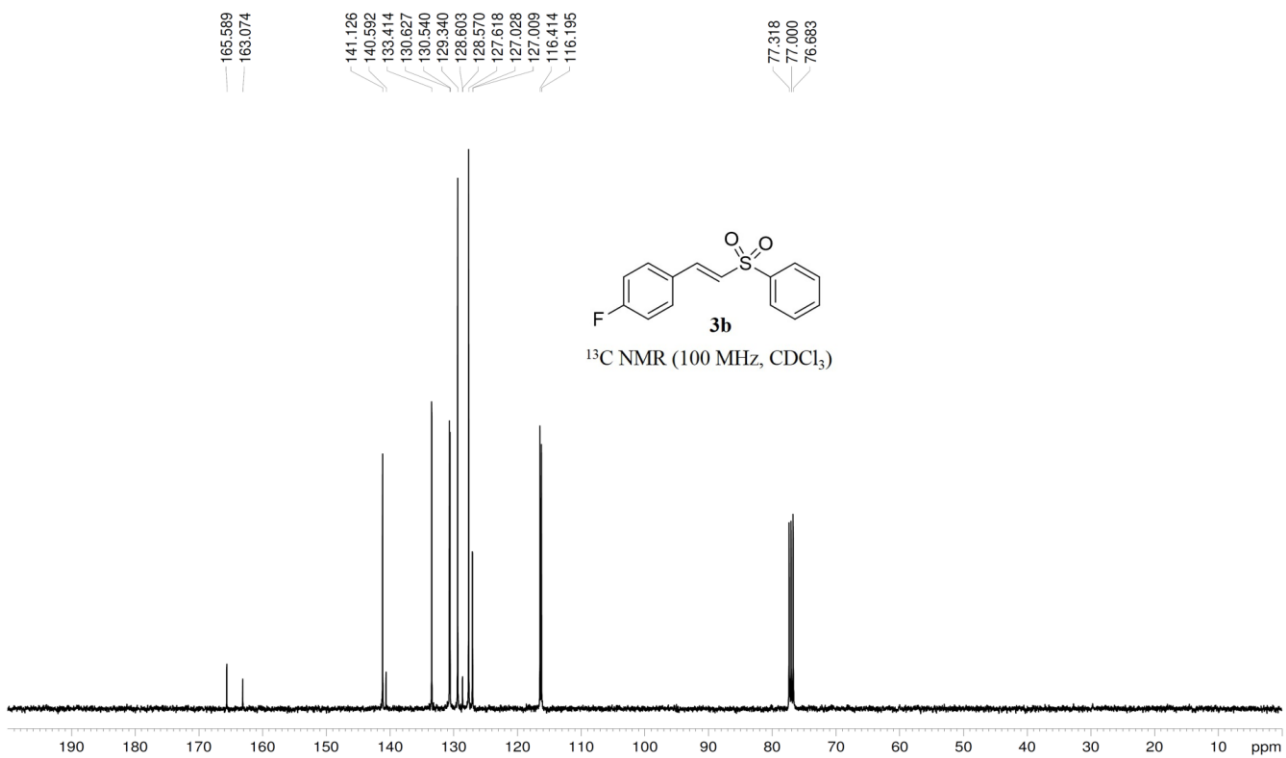

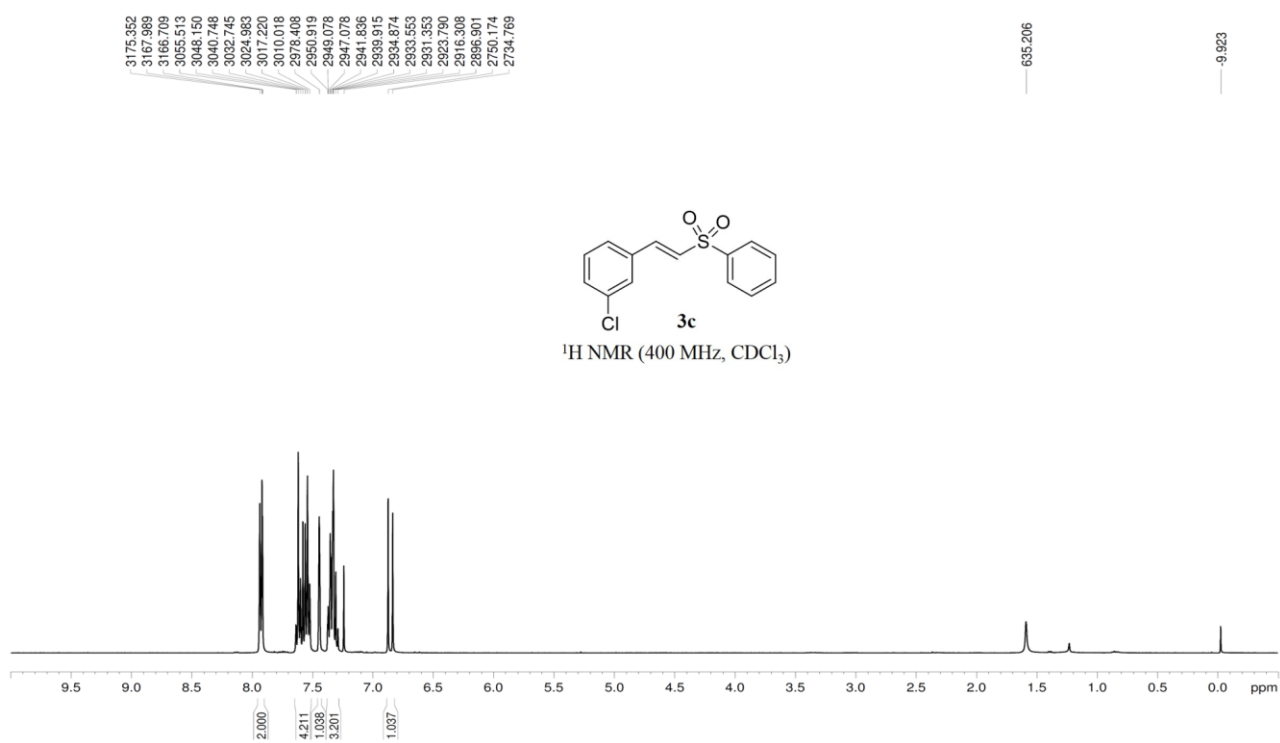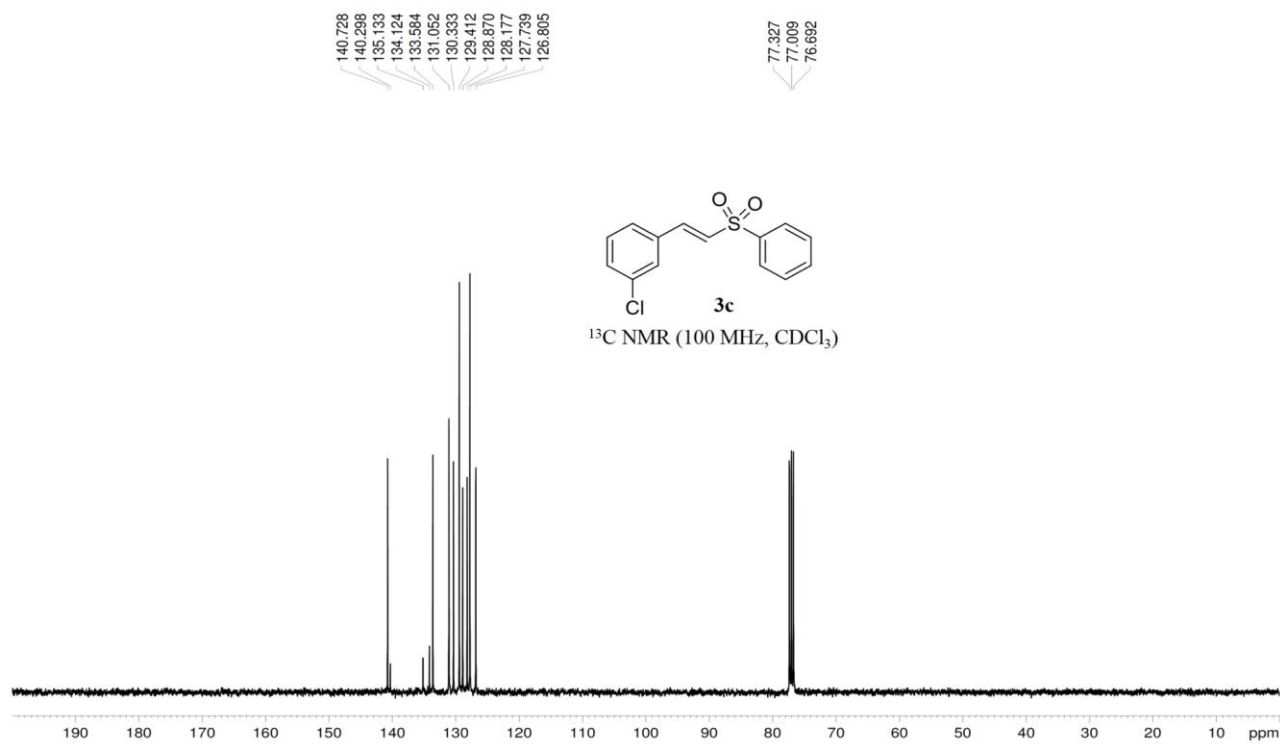

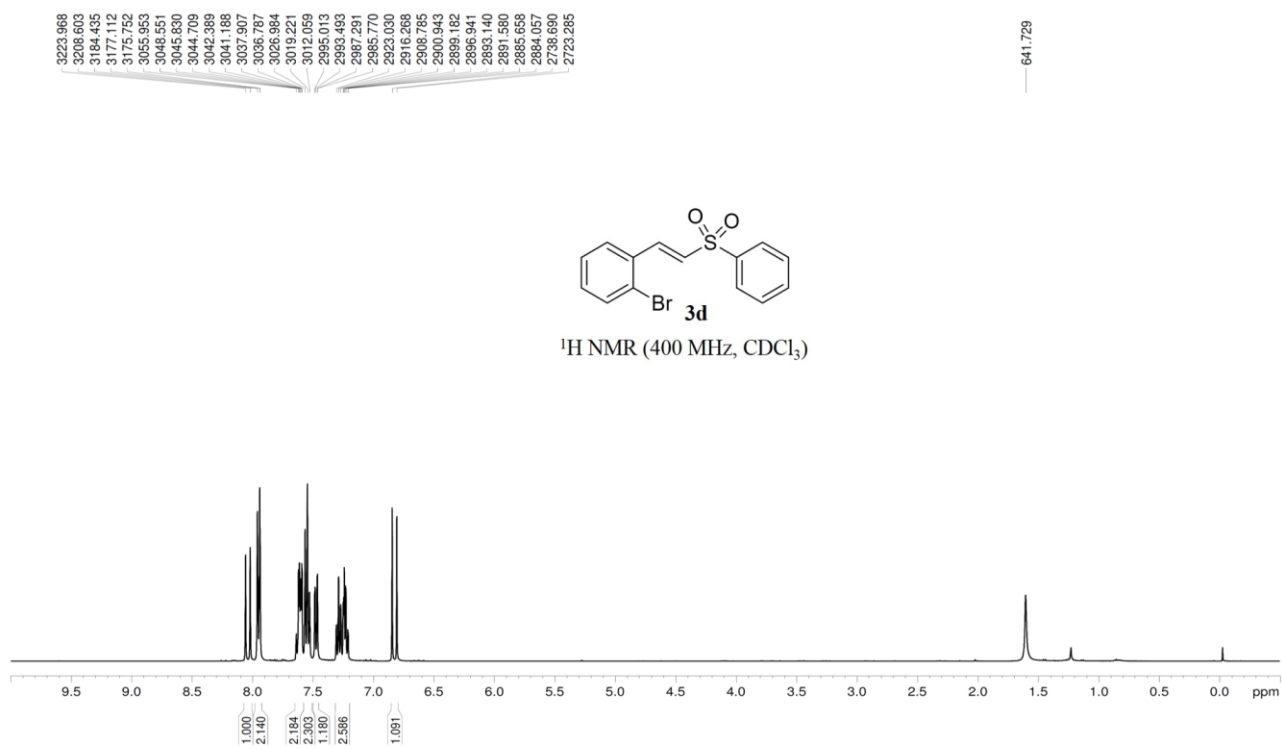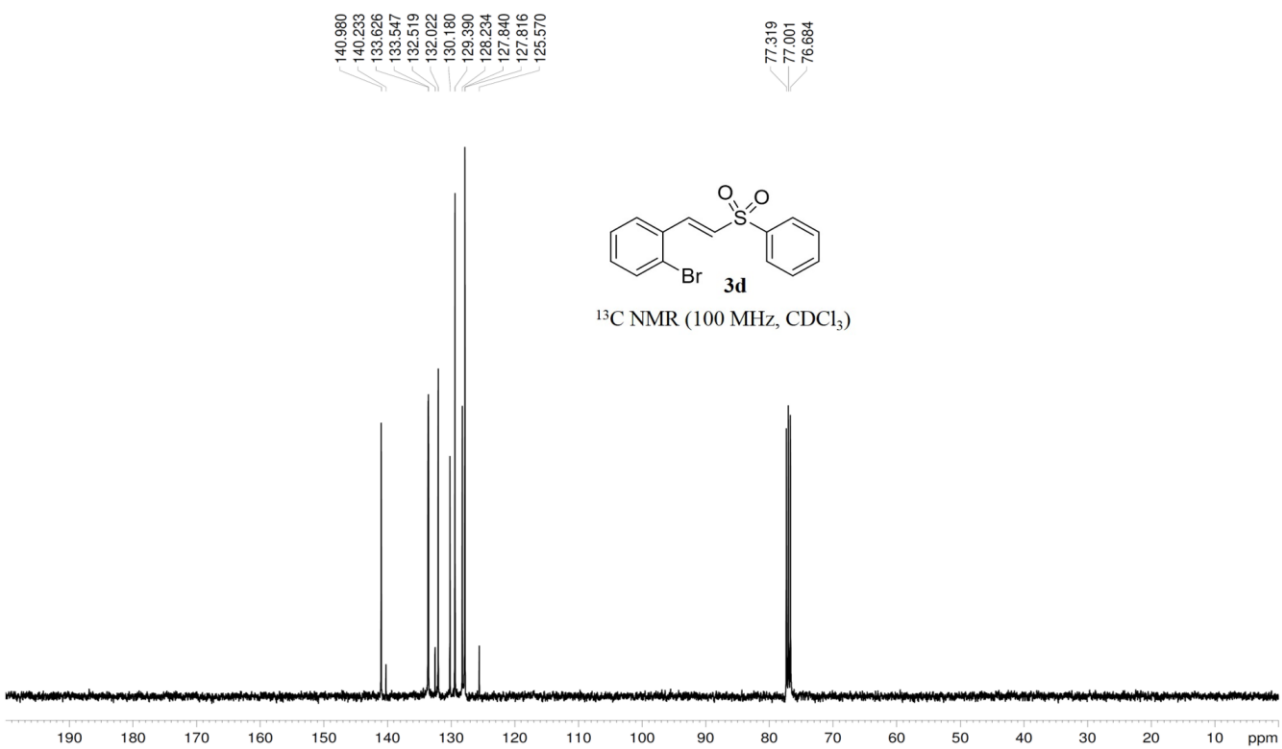

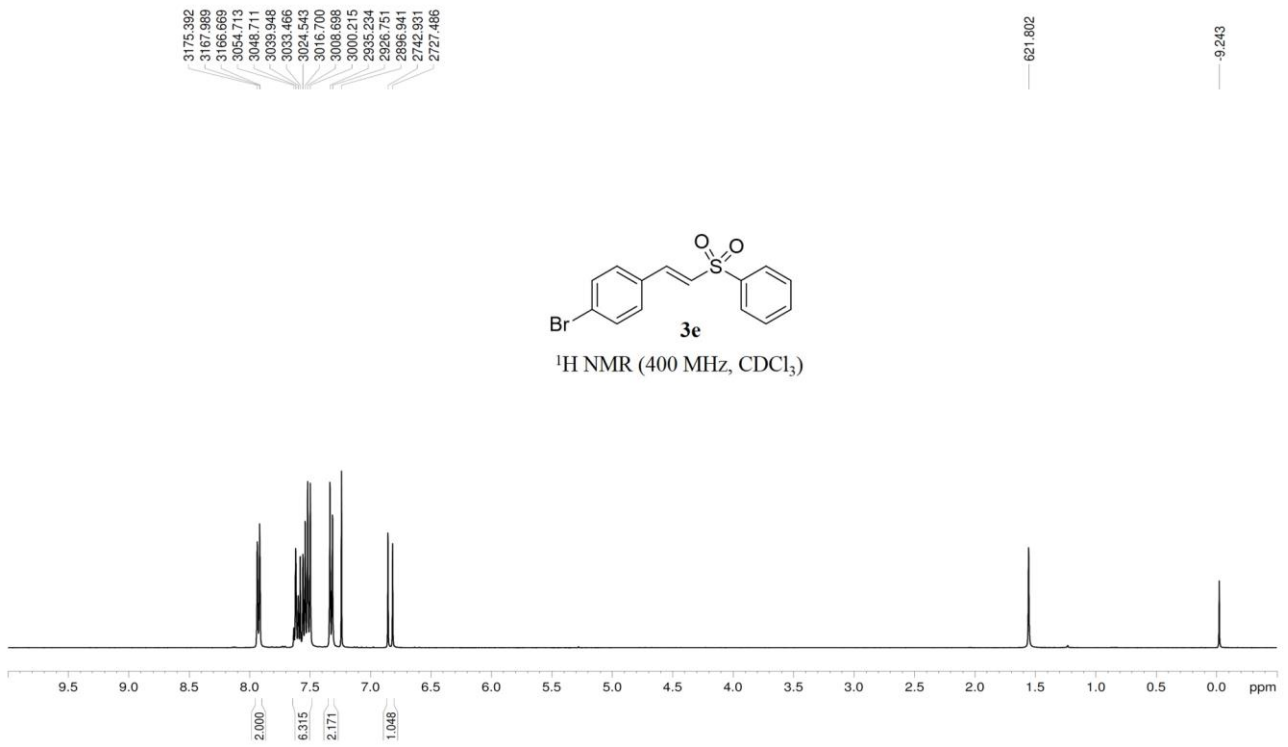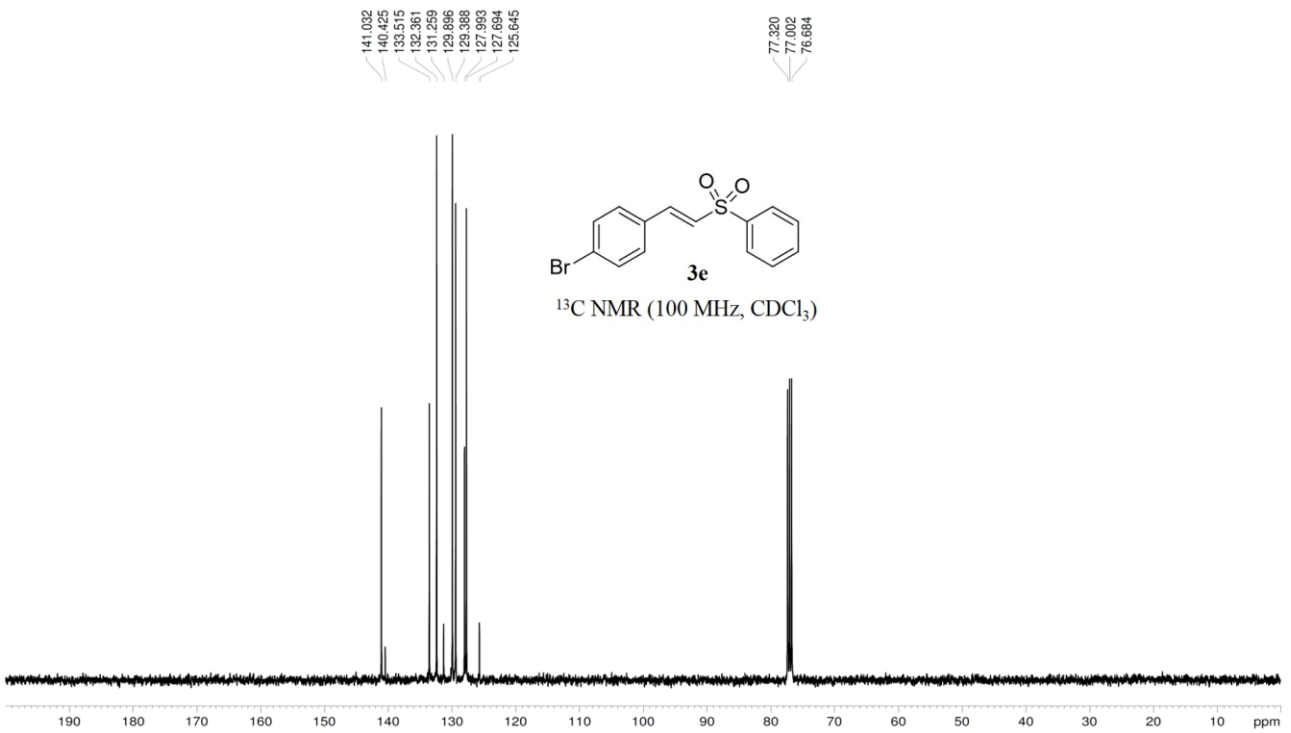

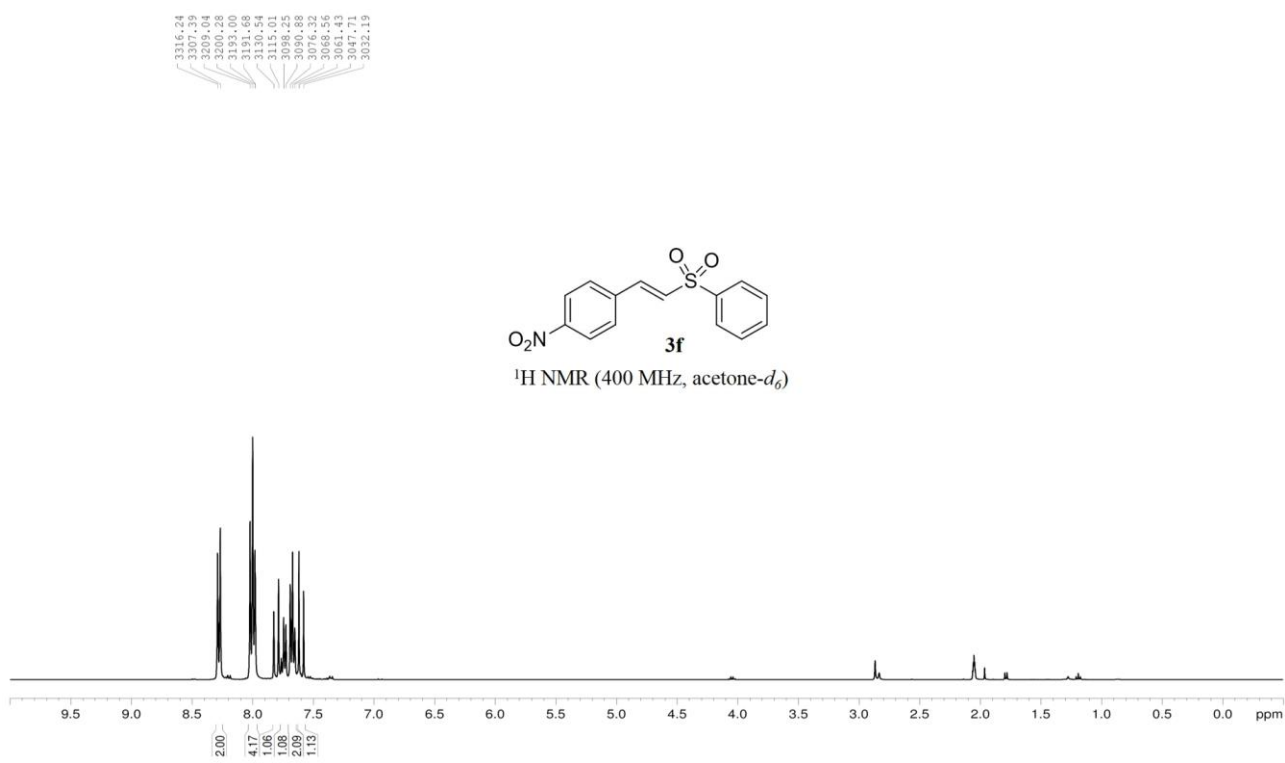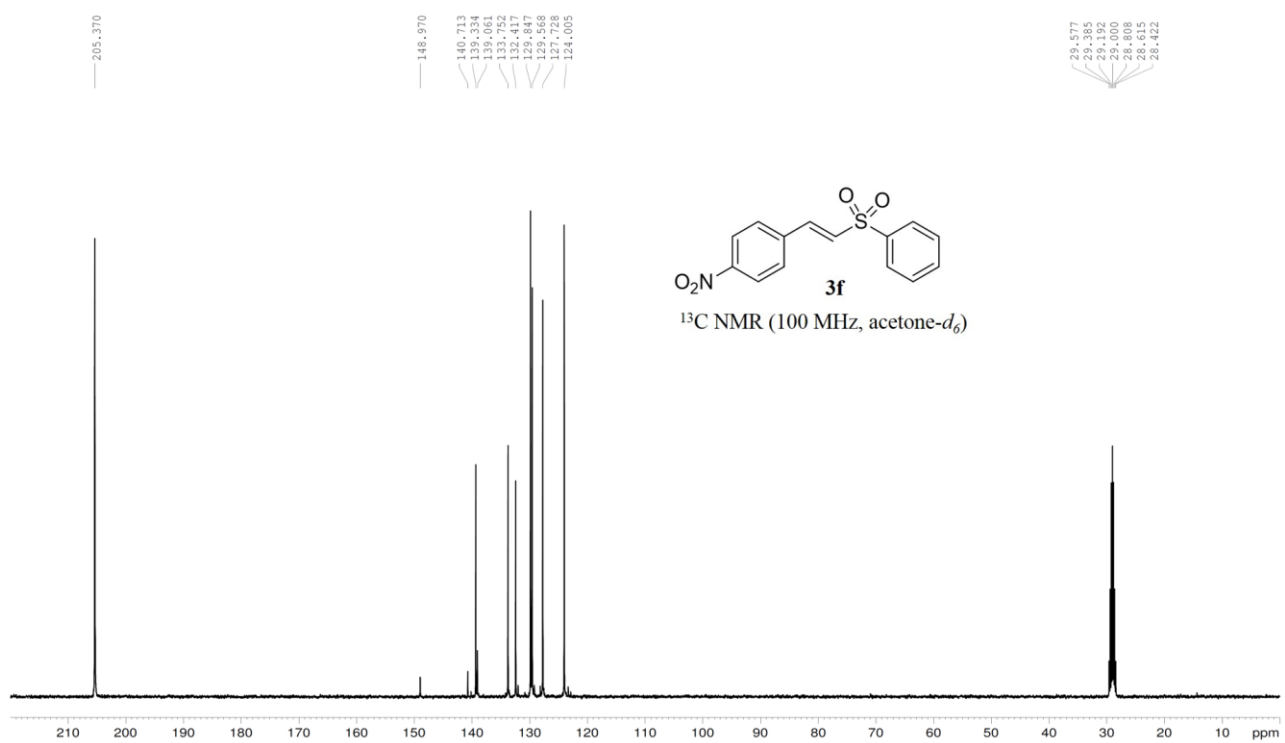



3179.75  
3172.35  
3171.86  
3064.28  
3060.95  
3053.87  
3047.79  
3040.19  
3037.40  
3016.50  
3010.90  
3009.54  
3003.38  
2995.61  
2987.11  
2771.62

490.72

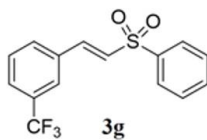

$^1\text{H NMR}$  (400 MHz,  $\text{CDCl}_3$ )

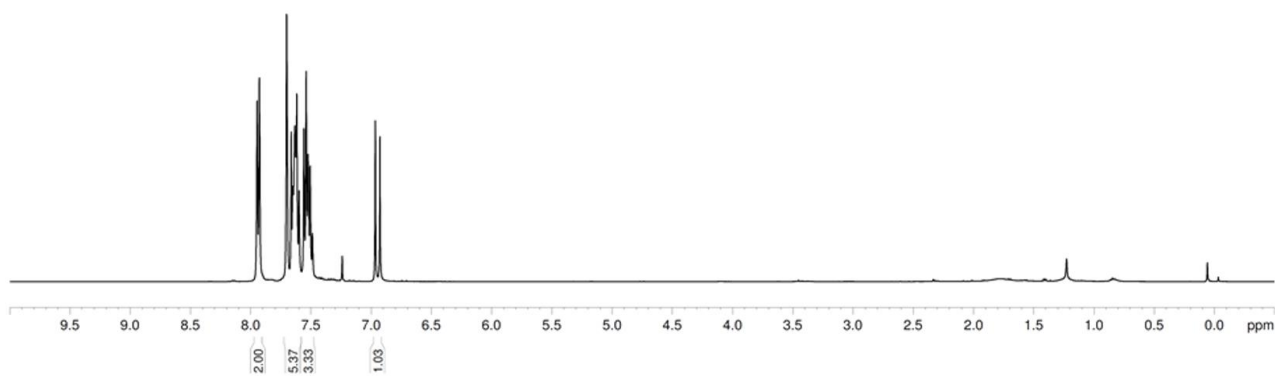

140.451  
140.098  
133.628  
133.112  
132.039  
131.886  
131.386  
131.060  
129.667  
129.400  
129.151  
129.082  
127.937  
127.723  
127.491  
127.456  
124.973  
124.516  
124.904  
124.853  
122.142

77.307  
76.990  
76.671

29.607

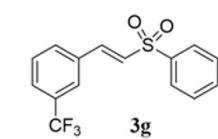

$^{13}\text{C NMR}$  (100 MHz,  $\text{CDCl}_3$ )

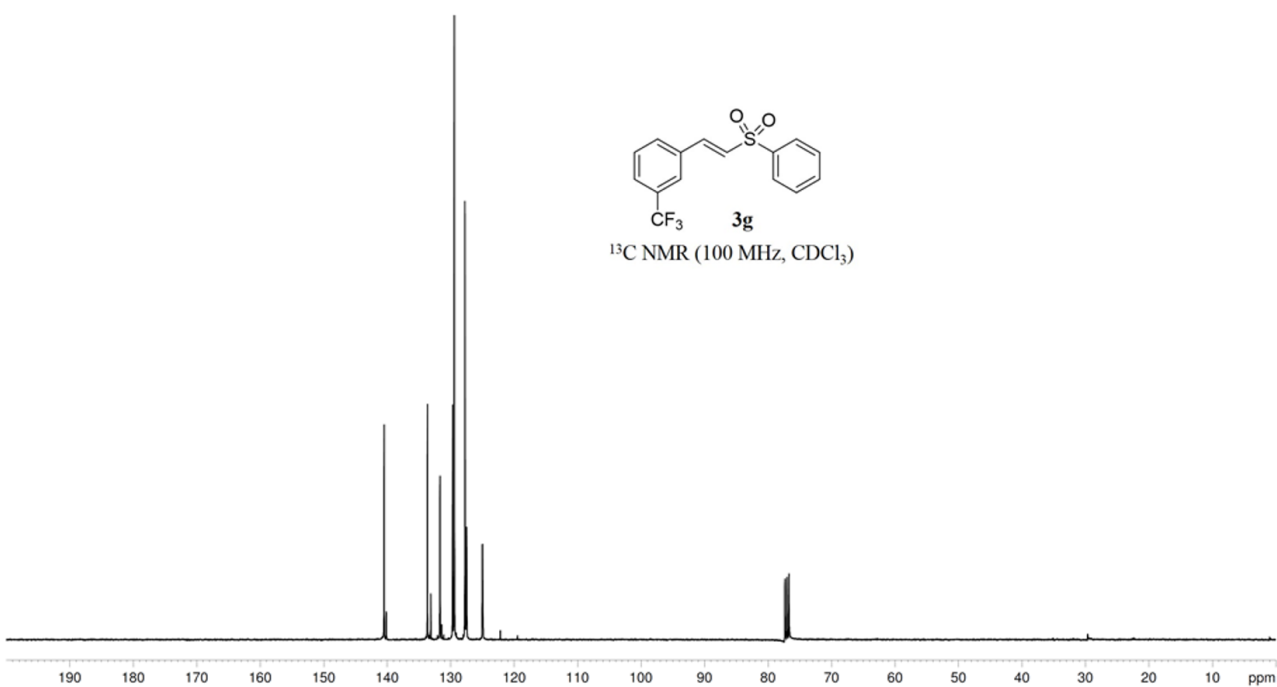

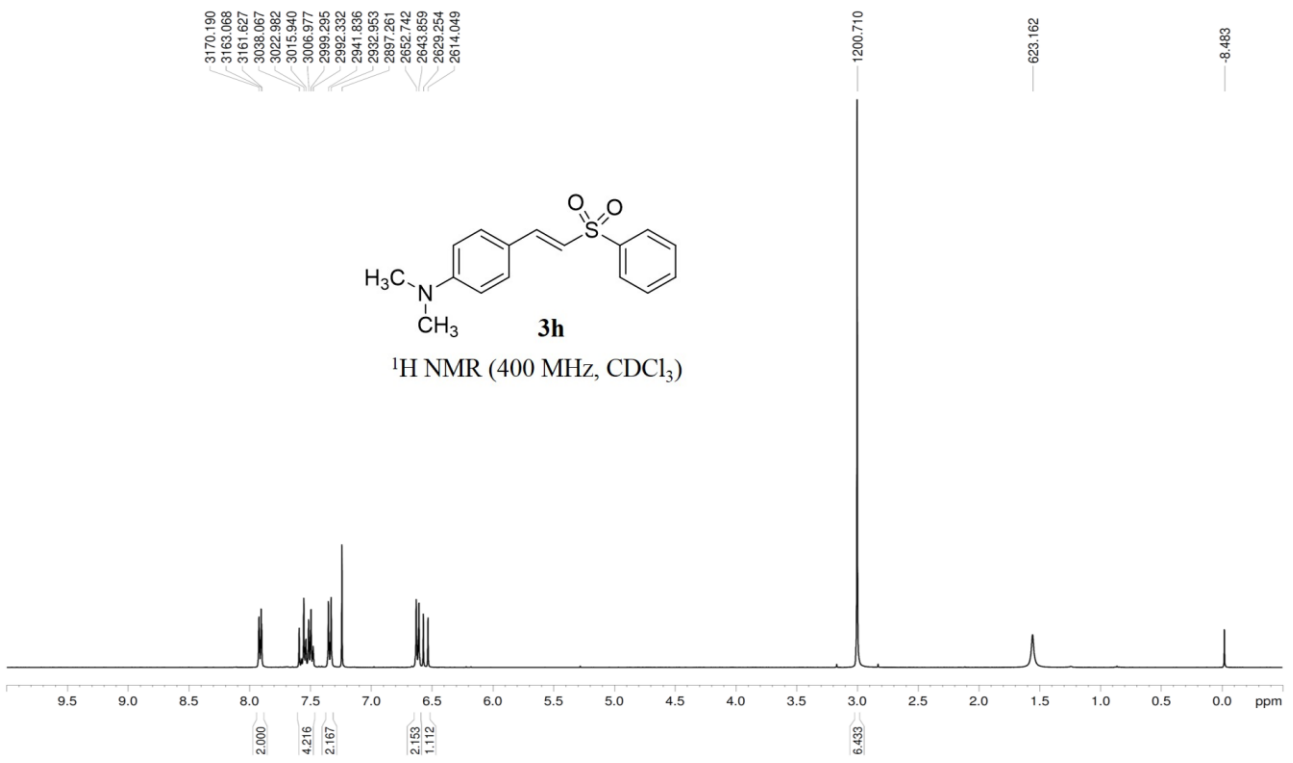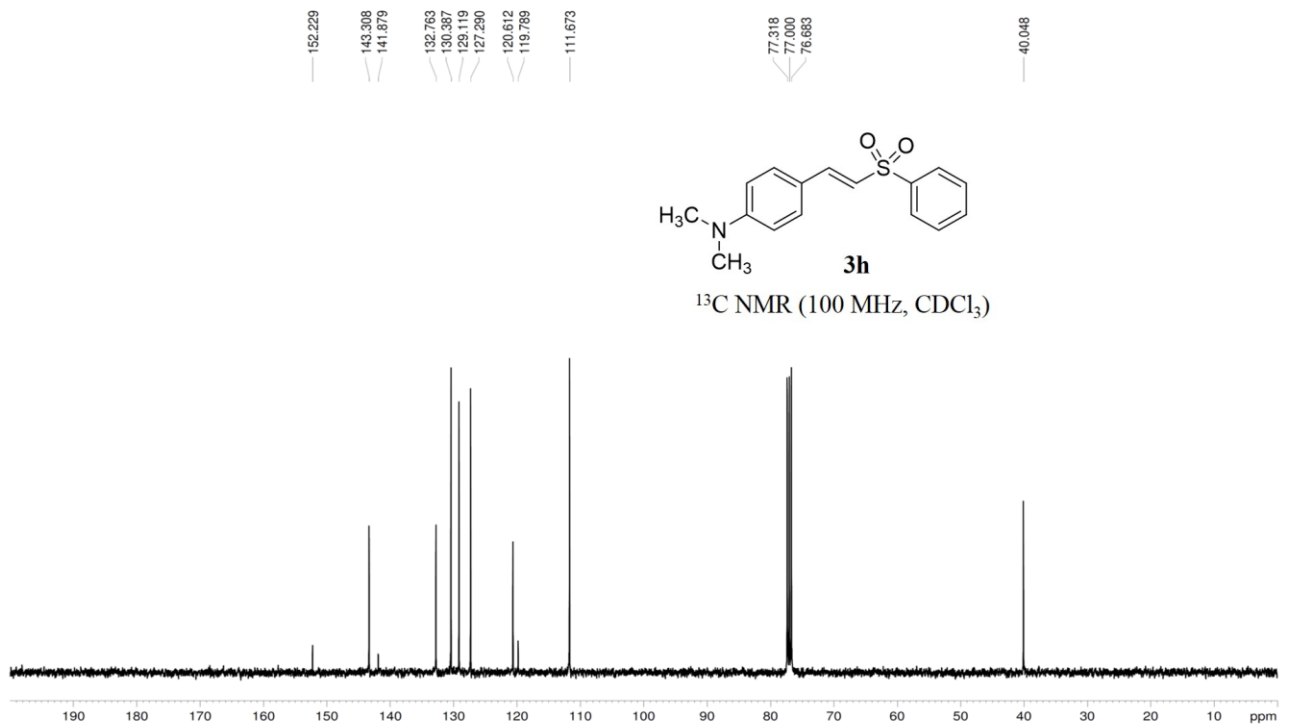

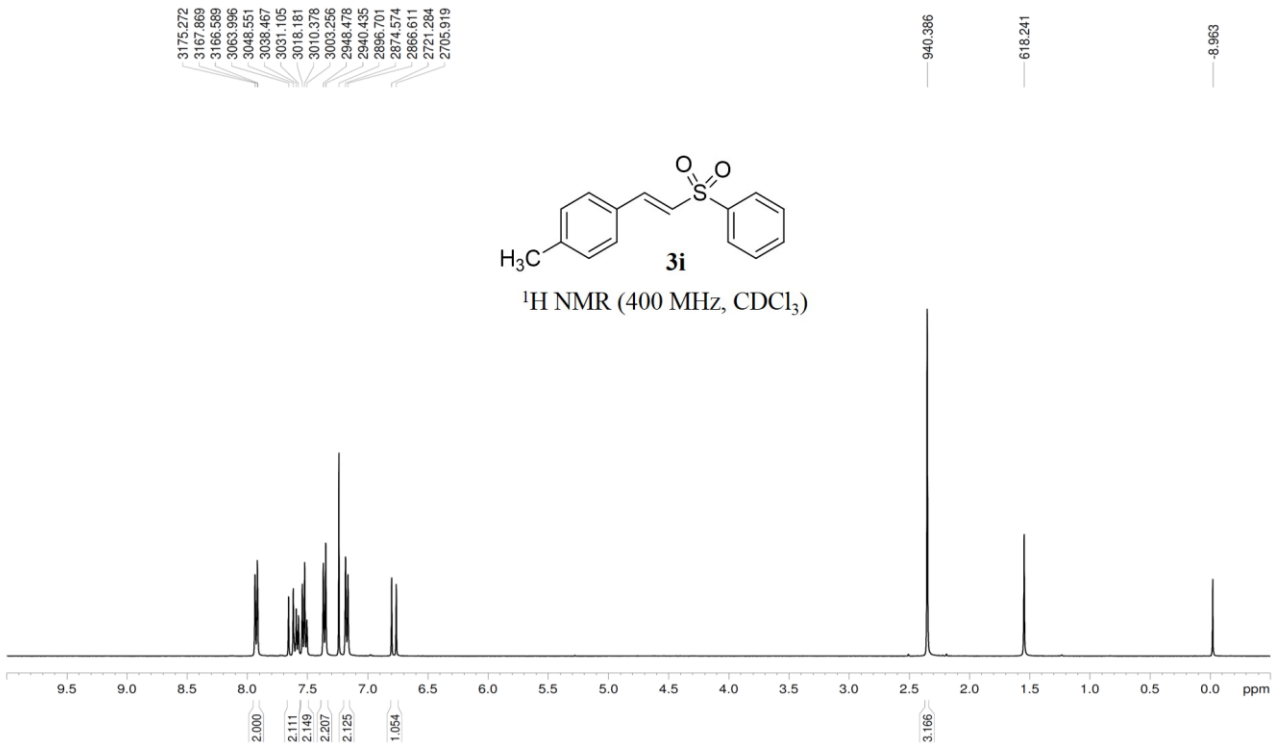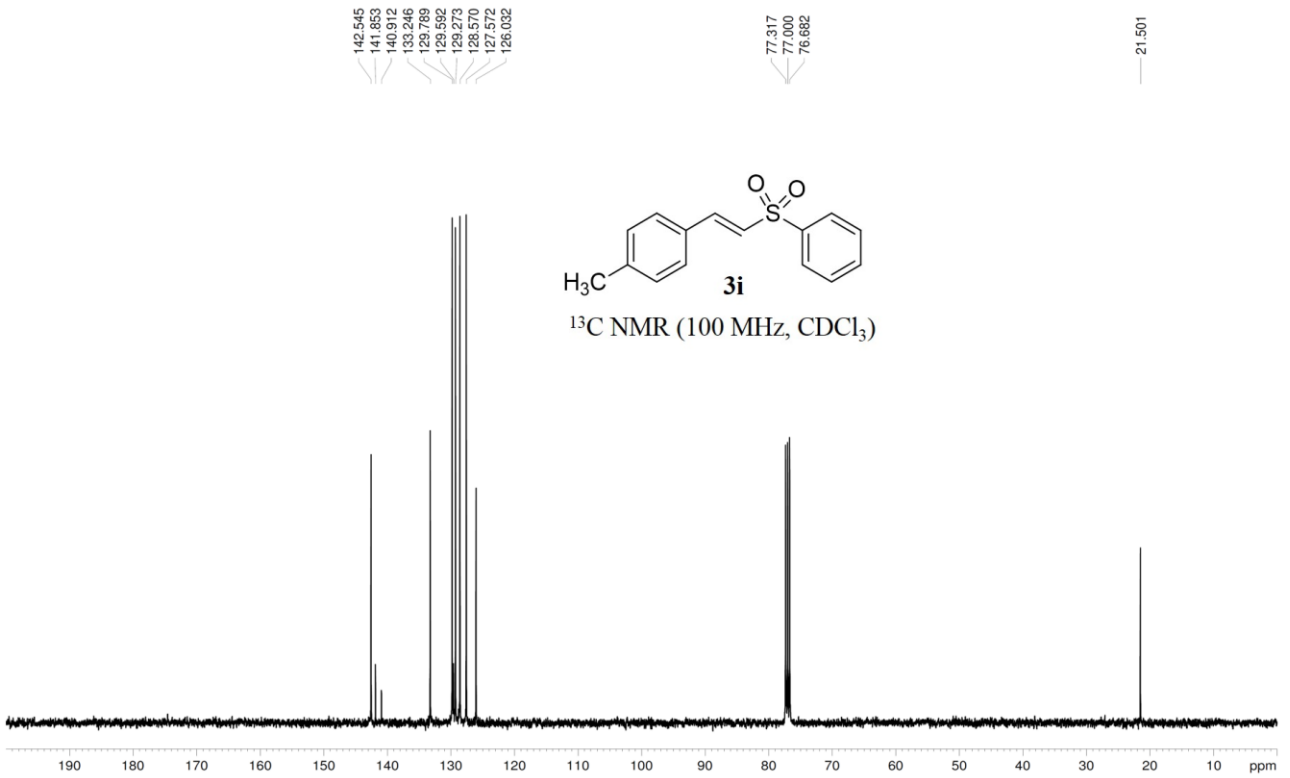

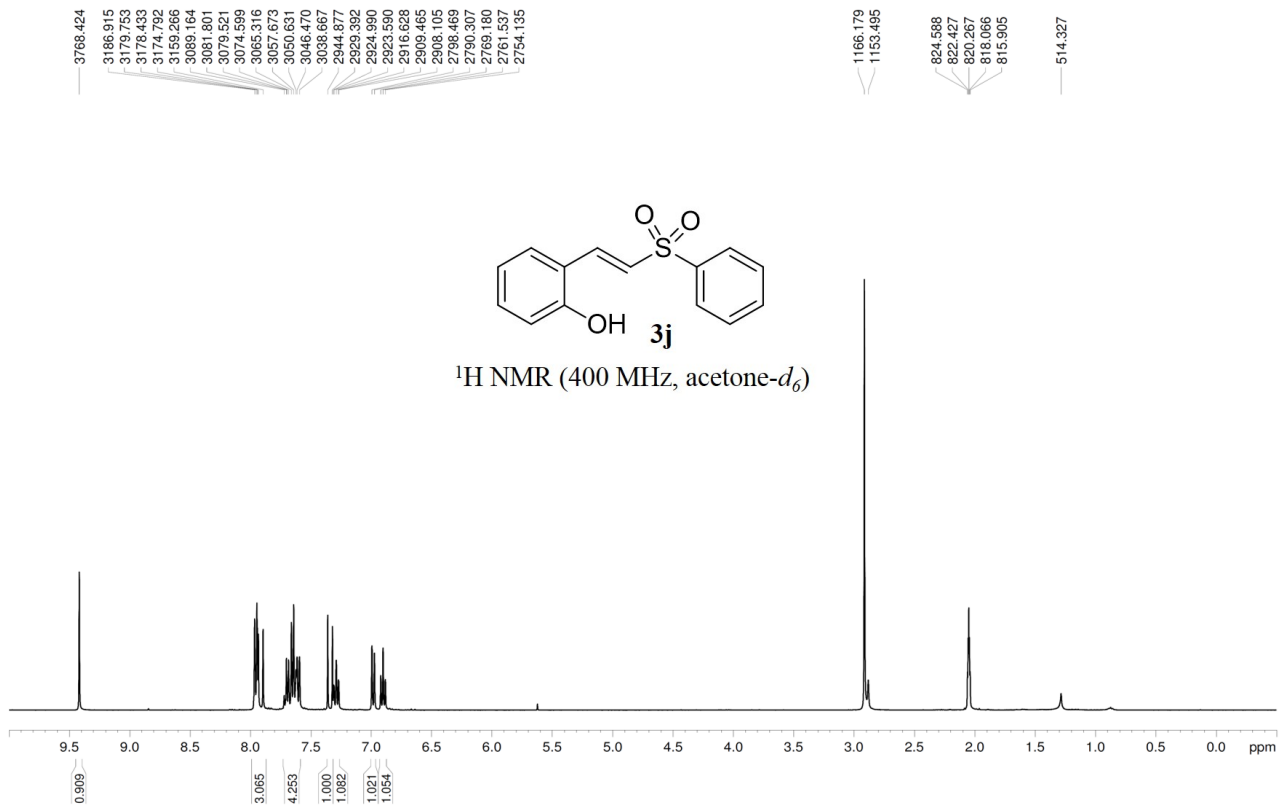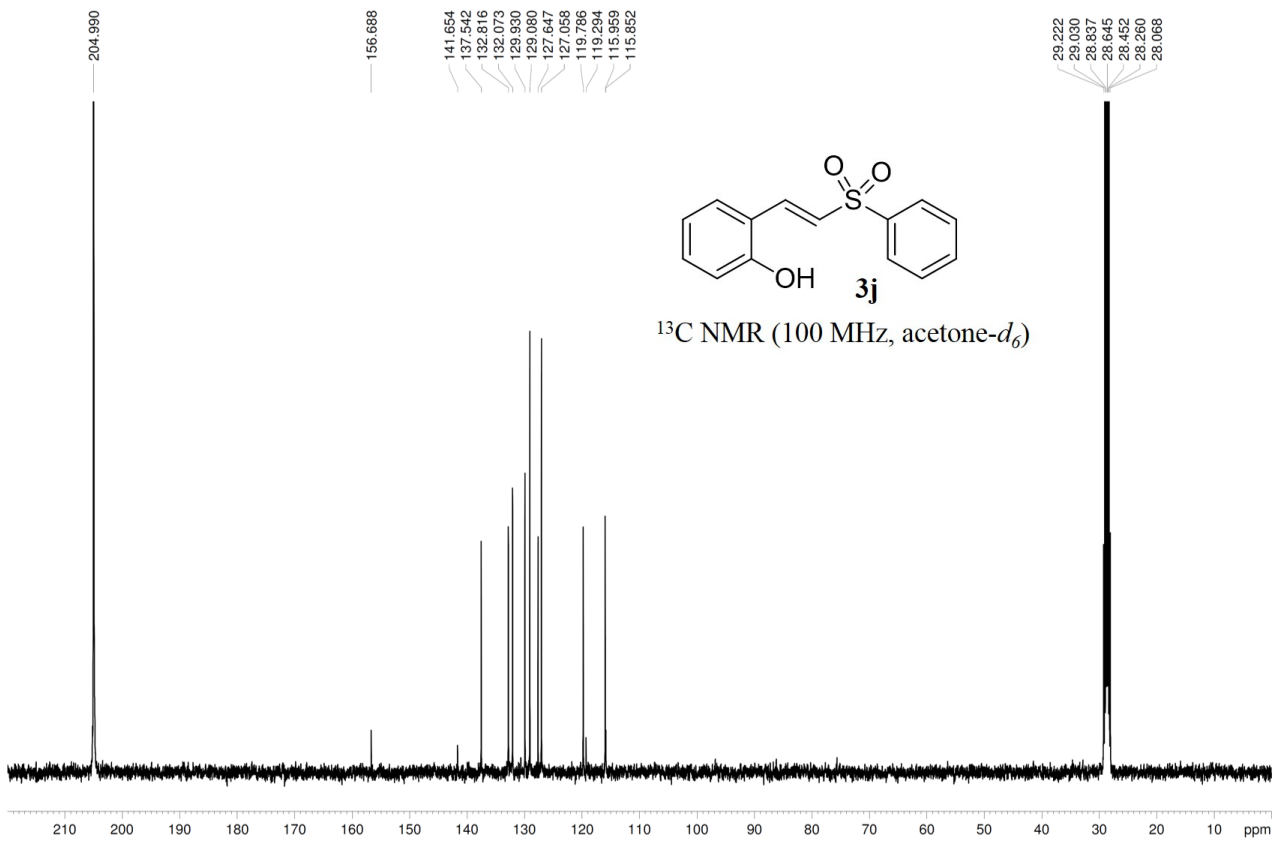

3168.75  
3161.51  
3160.19  
3041.35  
3034.67  
3018.55  
3018.02  
3010.22  
3002.98  
2897.02  
2892.26  
2876.49  
2876.49  
2799.67  
2791.87  
2783.90  
2781.98  
2777.98  
2760.86  
2760.86  
2754.66  
2752.77  
2730.77  
2715.36  
2405.18

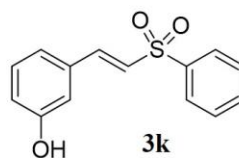

$^1\text{H NMR}$  (400 MHz,  $\text{CDCl}_3$ )

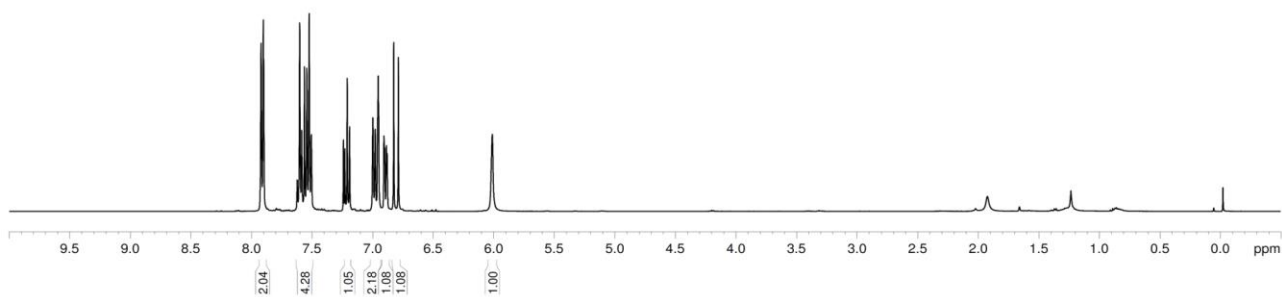

156.340  
142.559  
140.330  
133.593  
132.546  
130.775  
129.561  
127.121  
127.121  
121.188  
118.646  
114.546

77.318  
77.000  
76.683

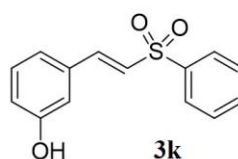

$^{13}\text{C NMR}$  (100 MHz,  $\text{CDCl}_3$ )

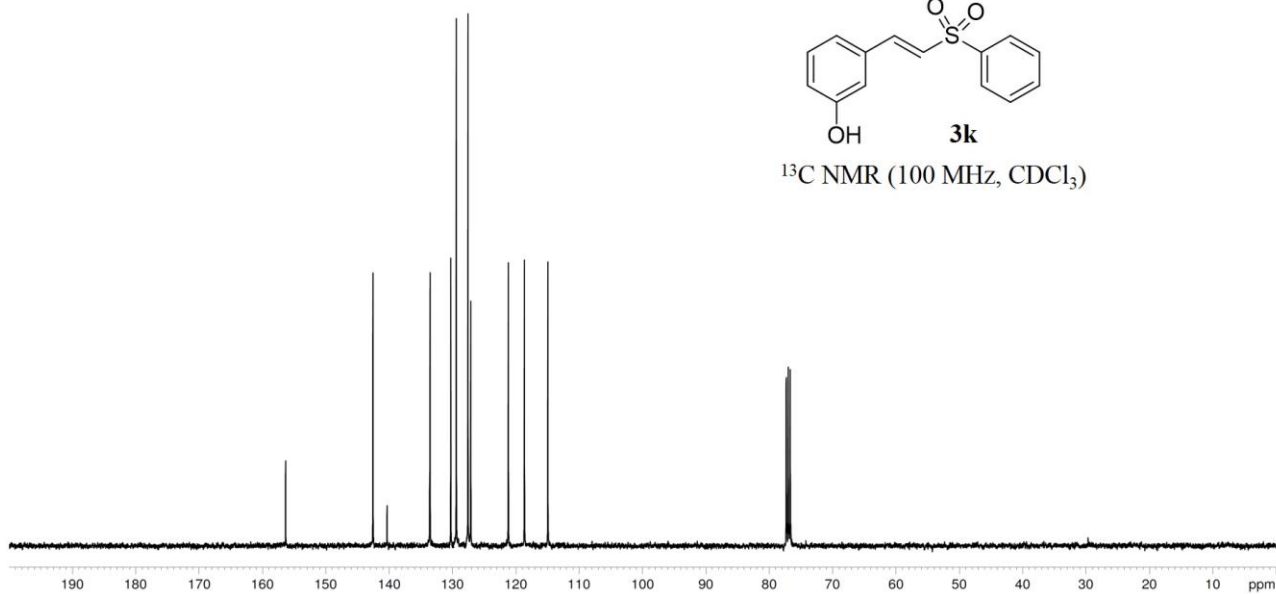

3167.189  
3159.787  
3043.349  
3036.667  
3028.664  
3021.742  
3014.700  
3006.937  
2999.735  
2929.632  
2921.029  
2897.381  
2737.329  
2728.767  
2665.026  
2649.701

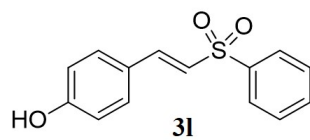

$^1\text{H NMR}$  (400 MHz,  $\text{CDCl}_3$ )

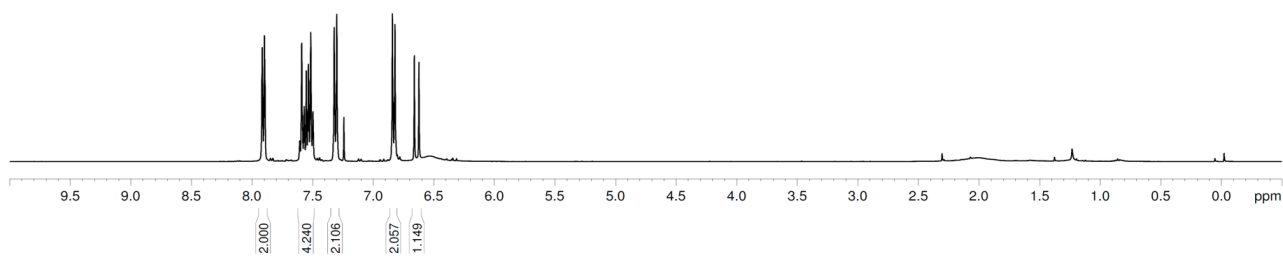

158.977  
142.714  
140.849  
133.362  
130.672  
129.374  
127.451  
124.655  
123.786  
116.216  
77.367  
77.050  
76.732

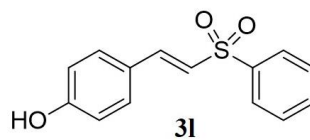

$^{13}\text{C NMR}$  (100 MHz,  $\text{CDCl}_3$ )

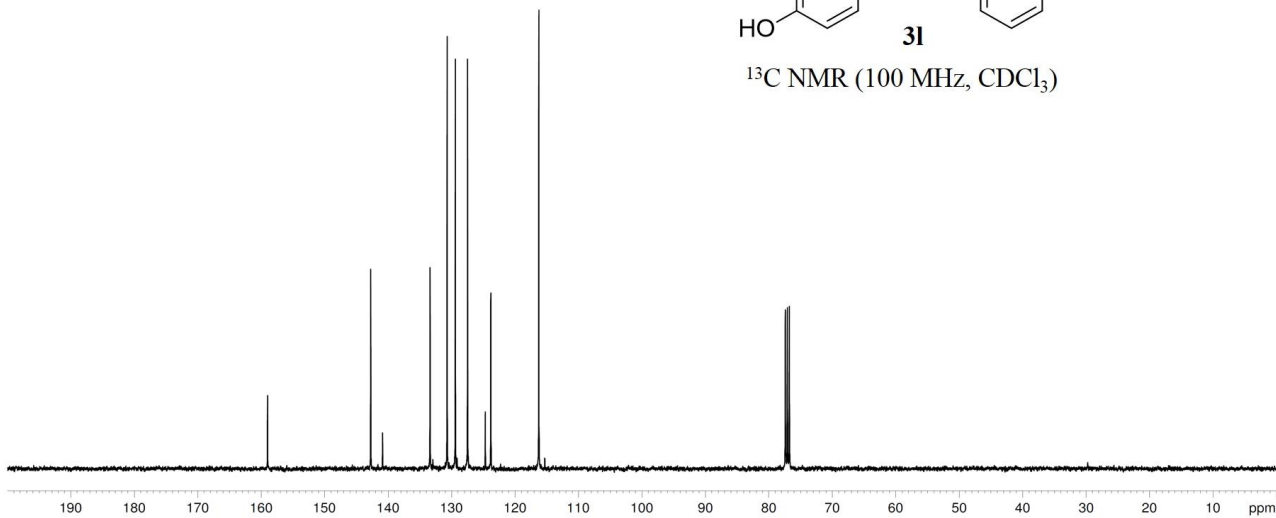

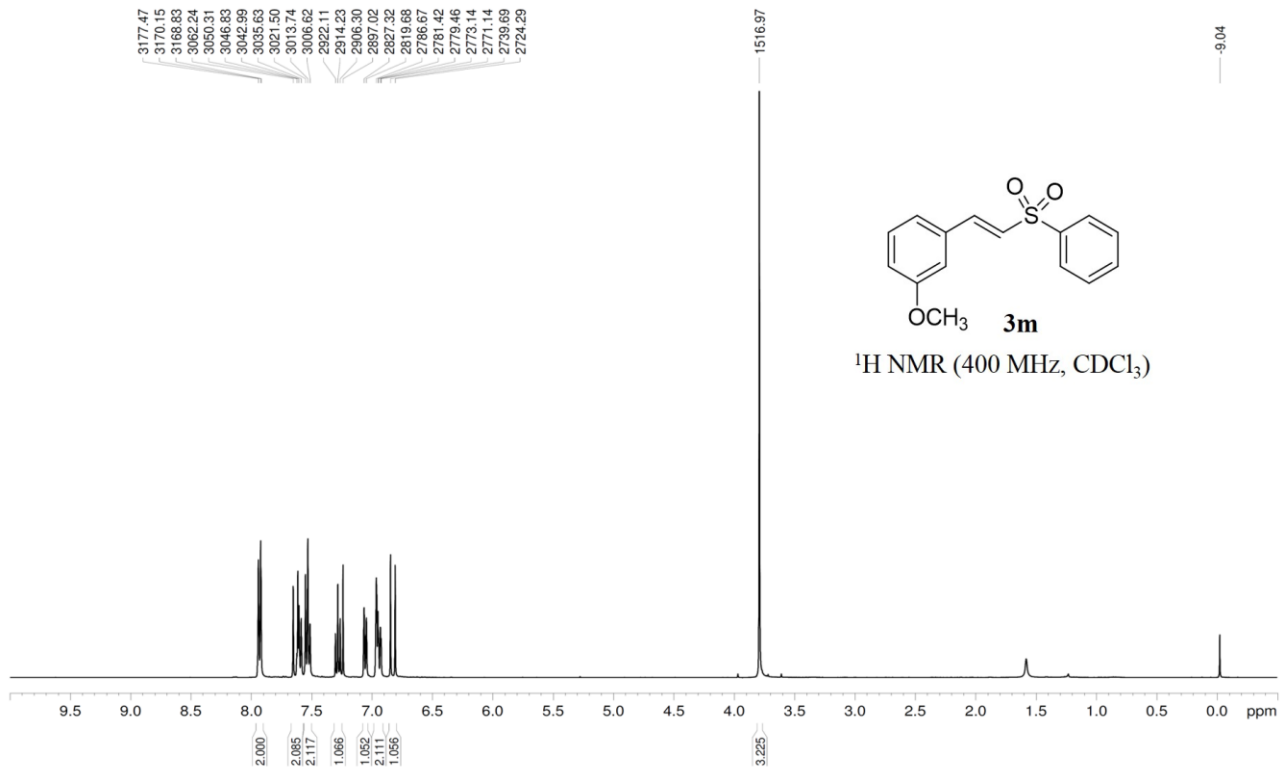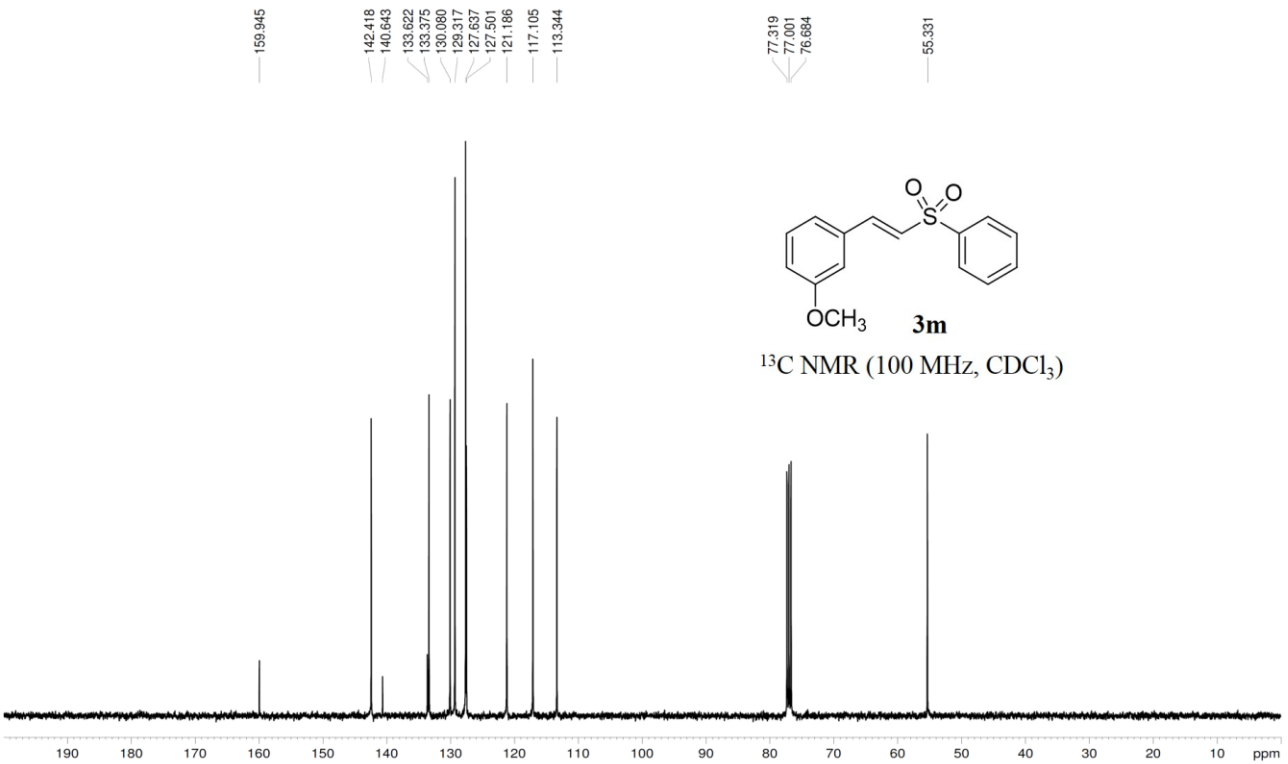

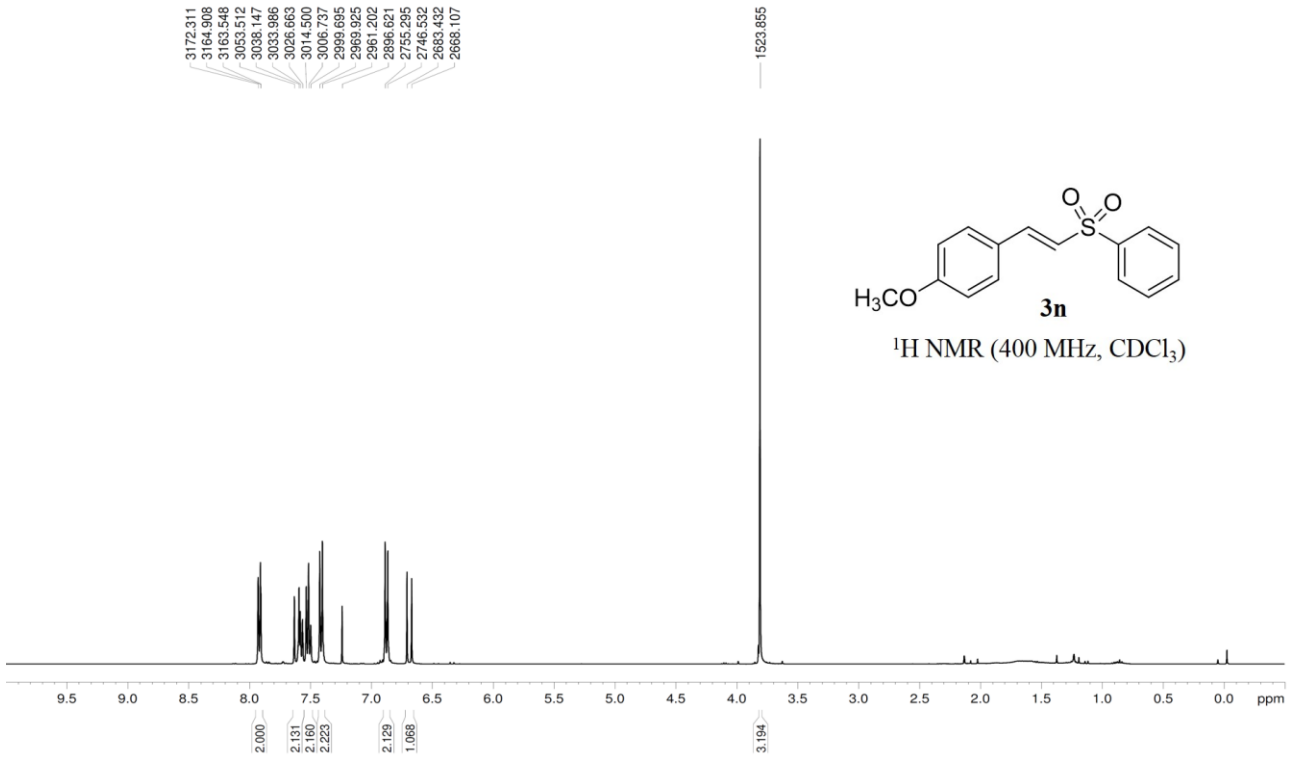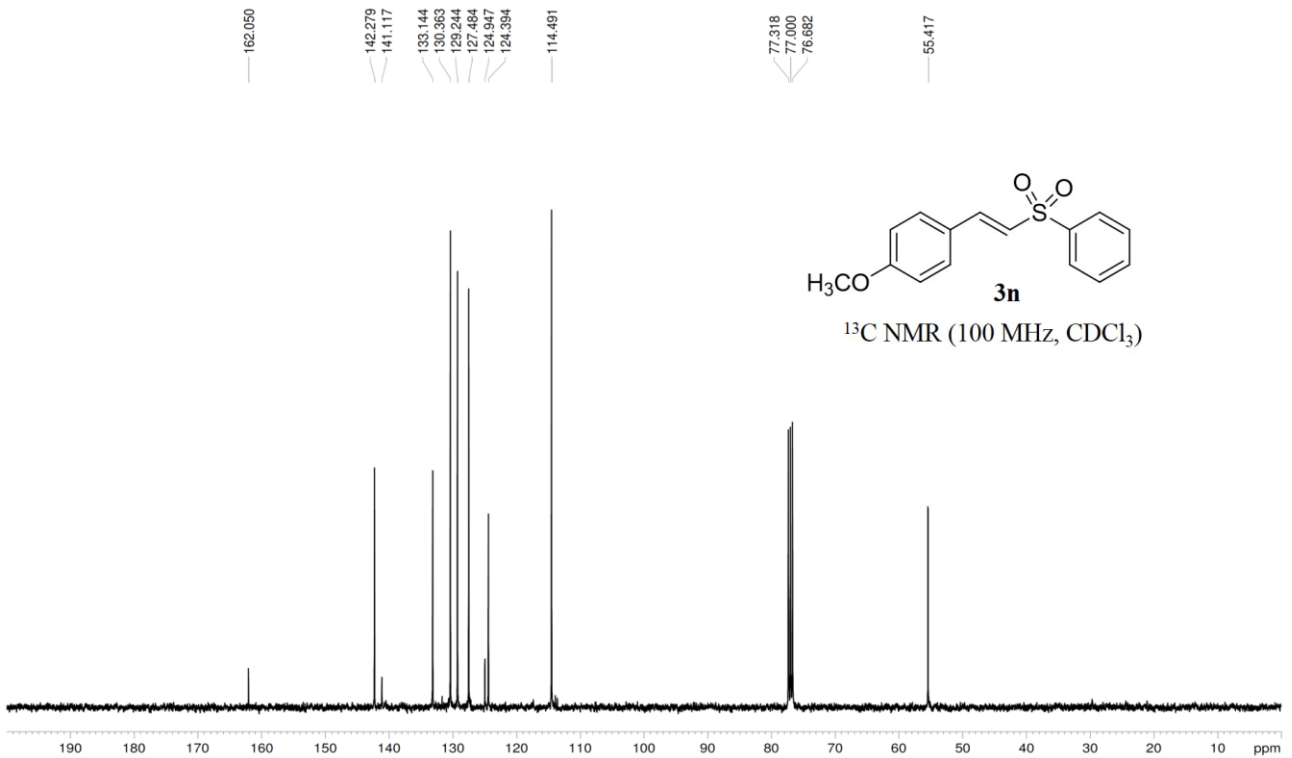



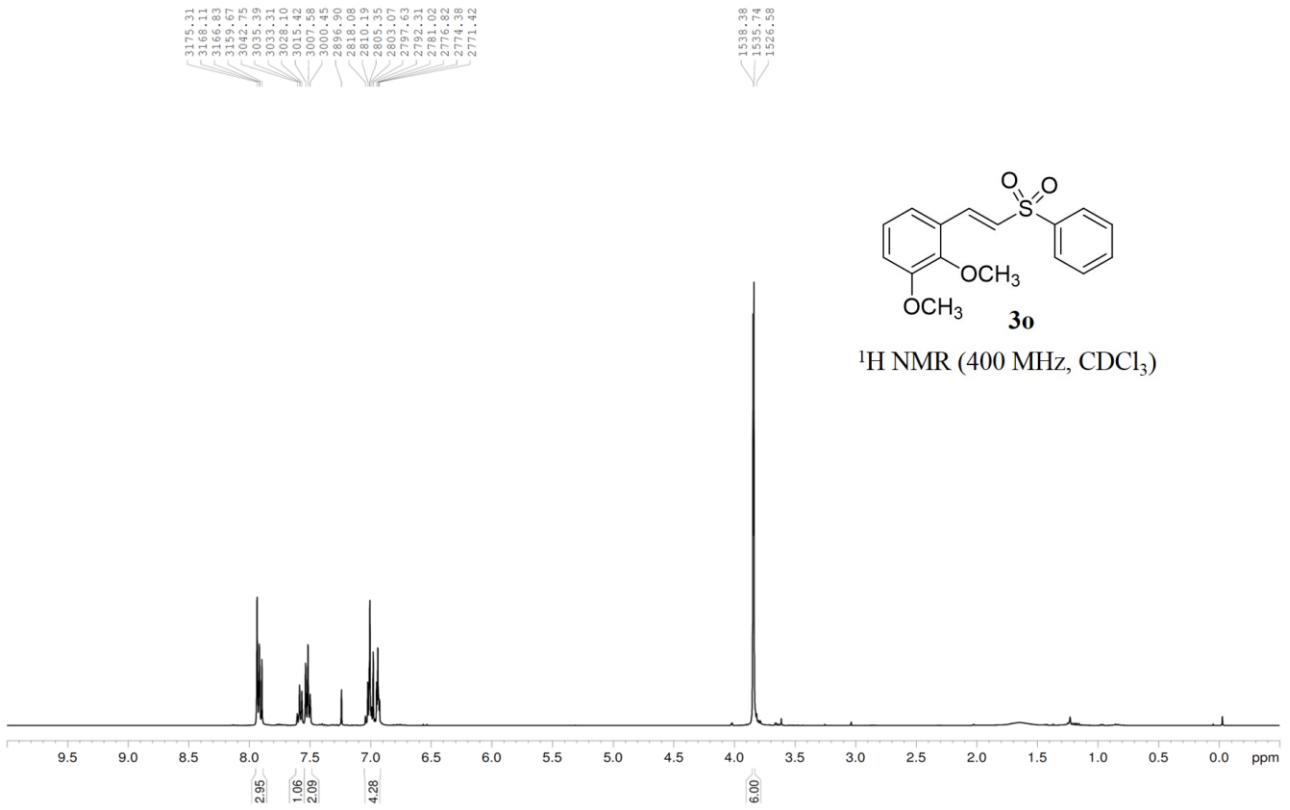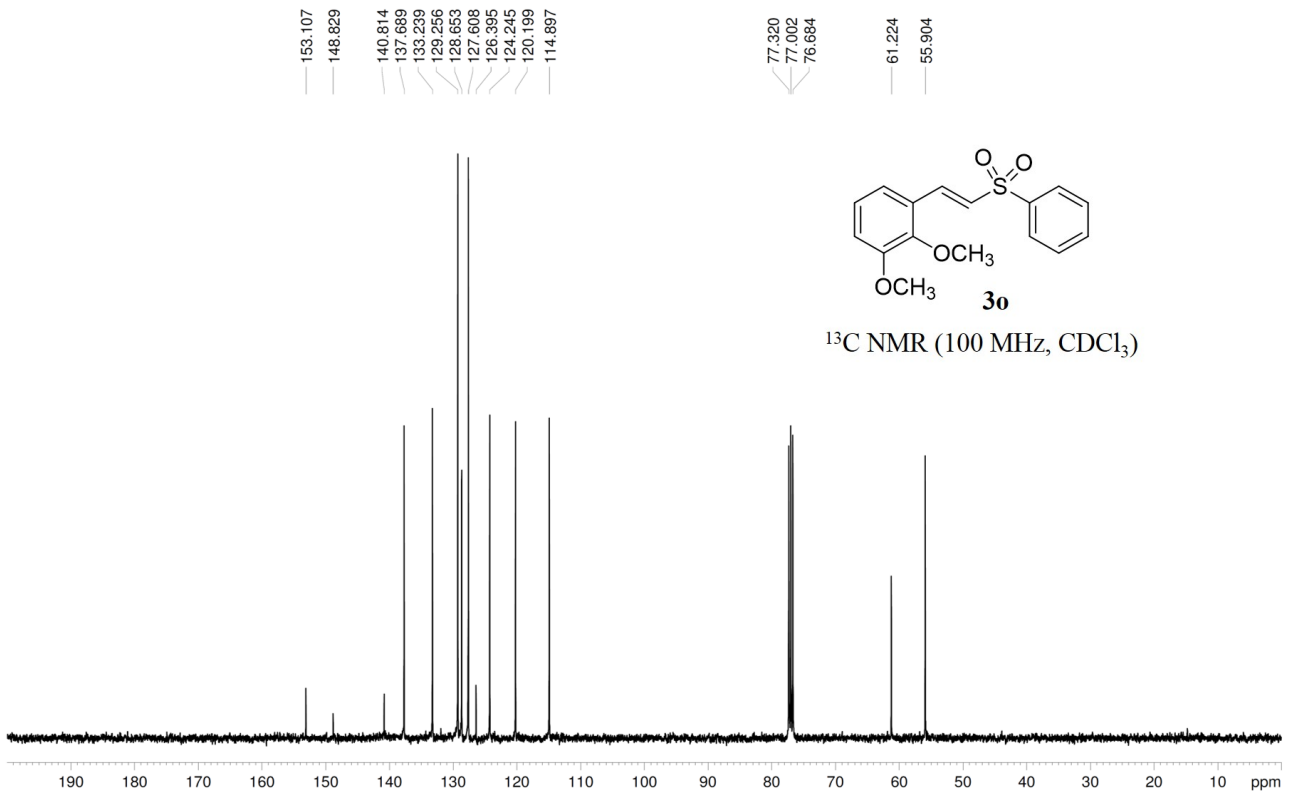

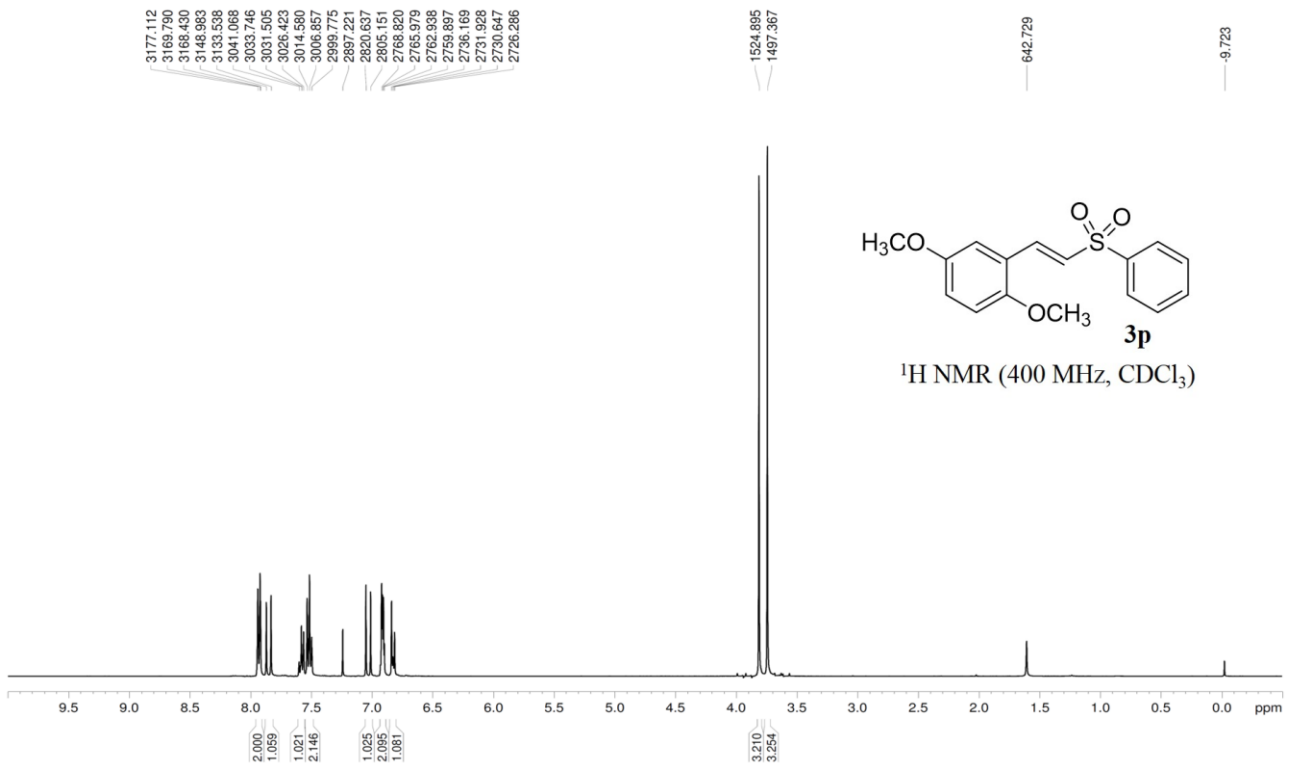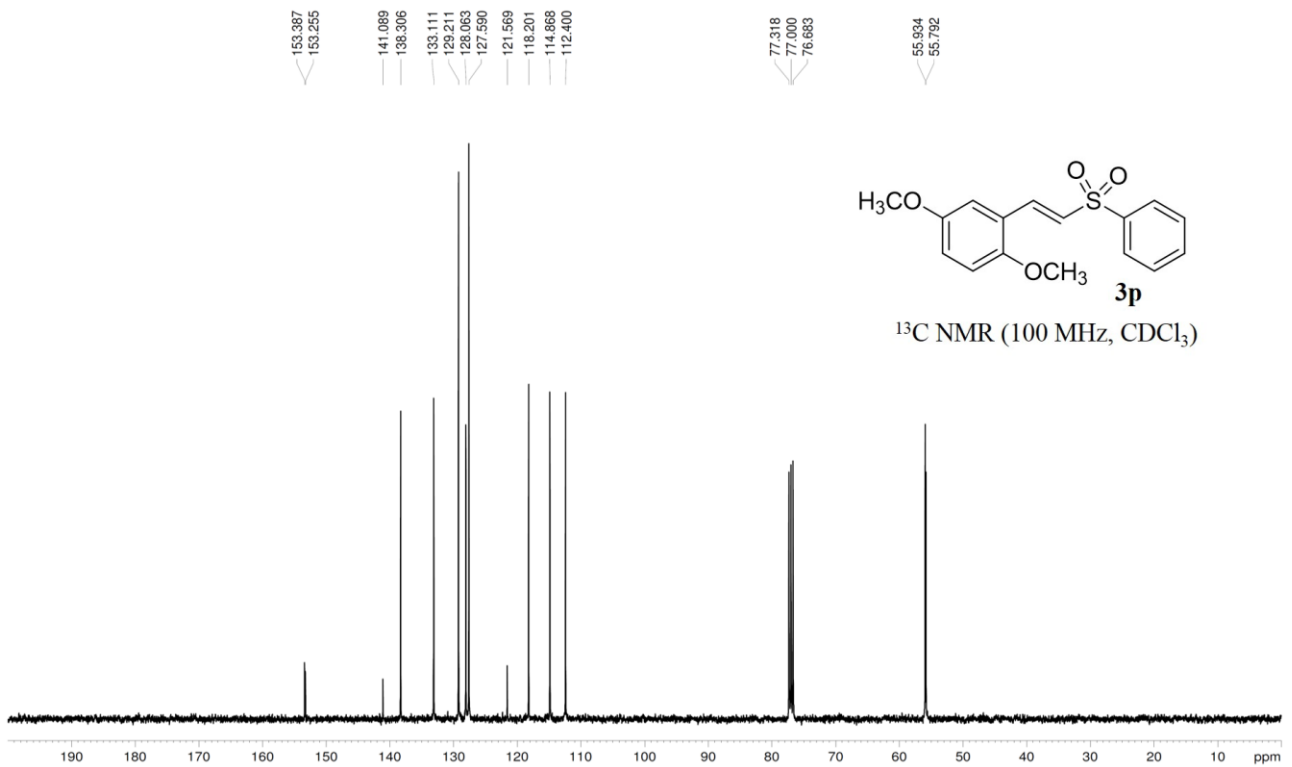

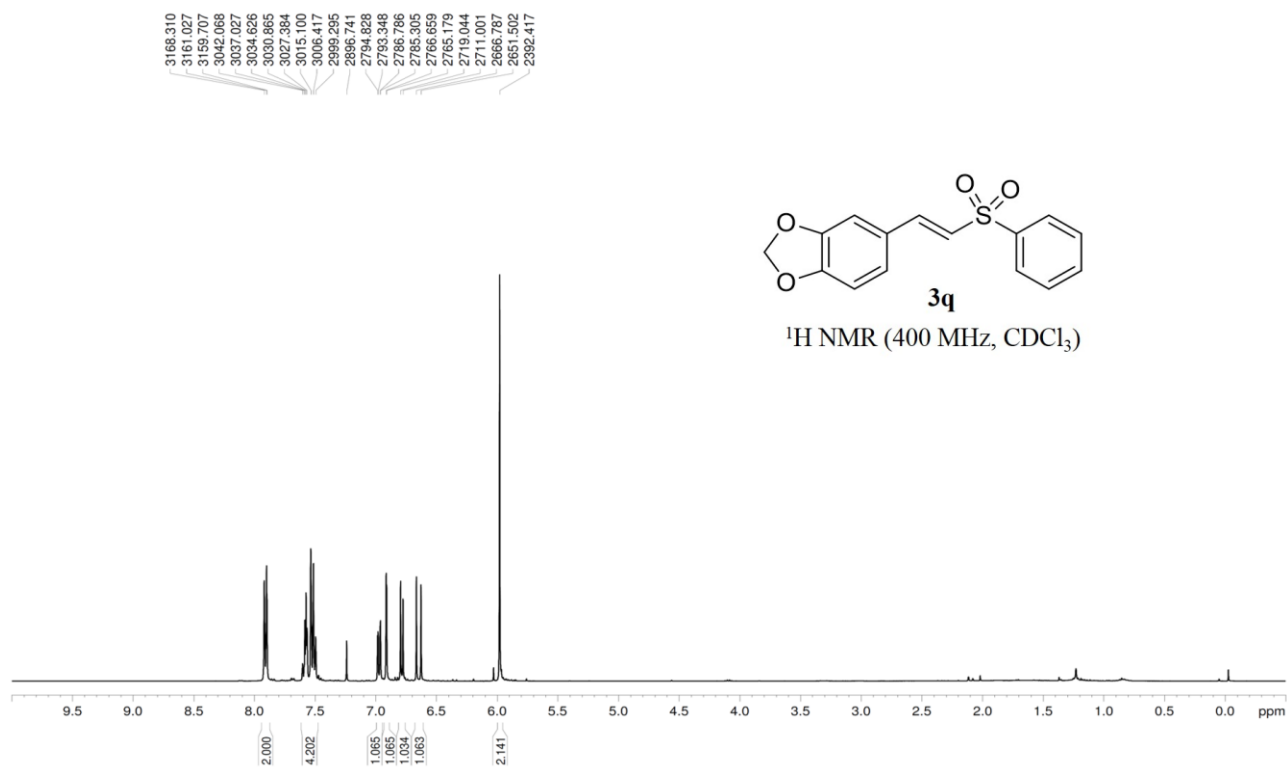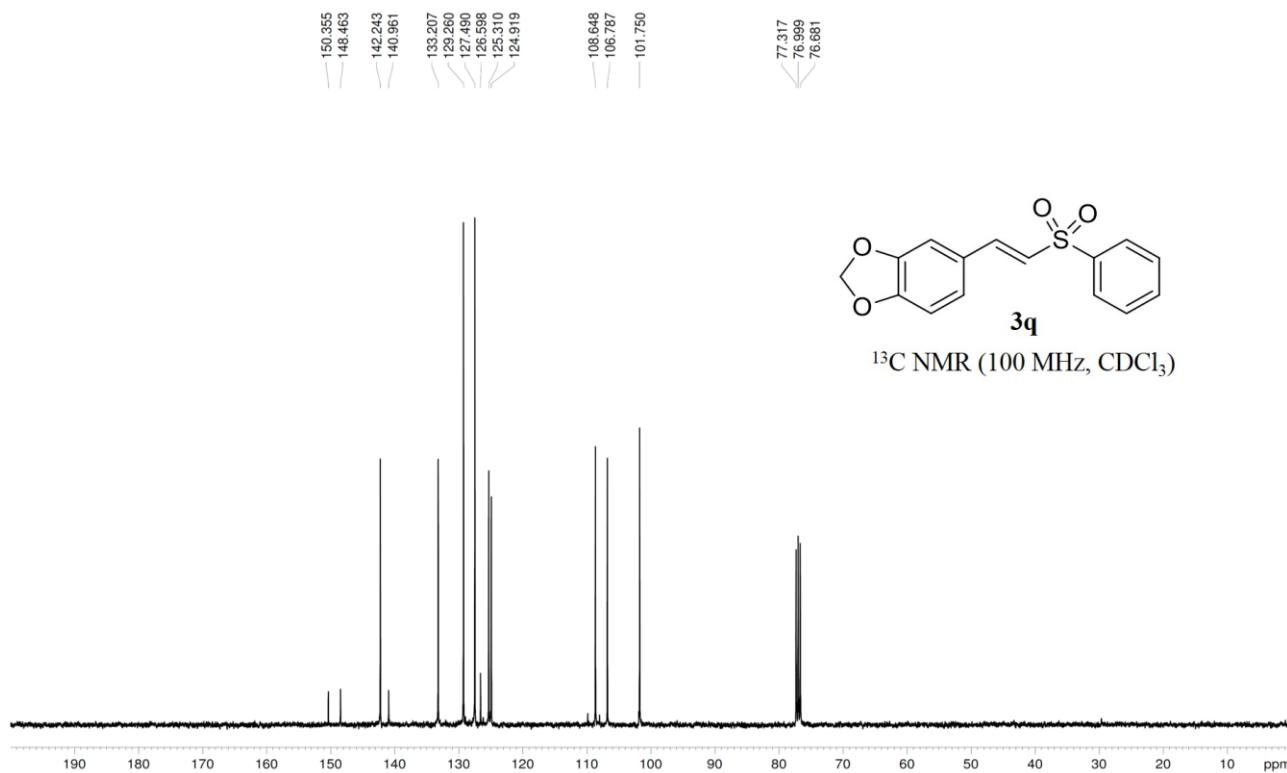

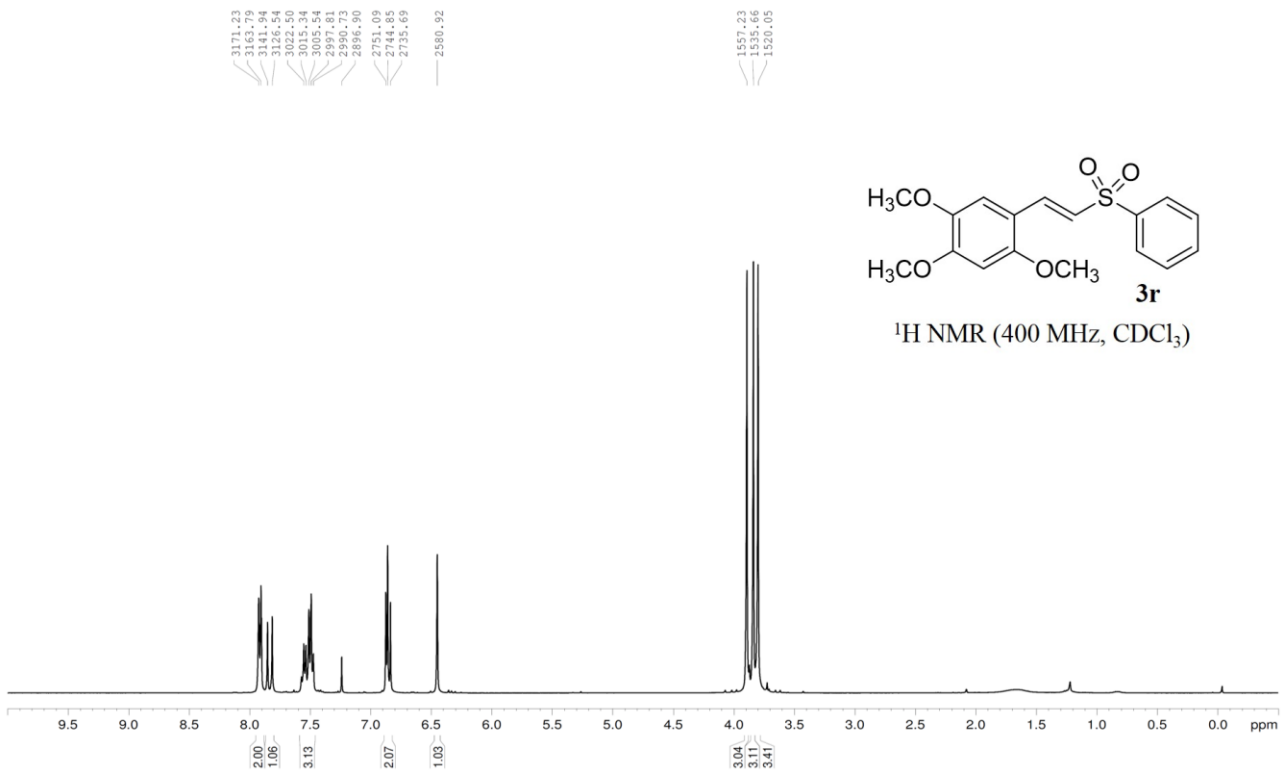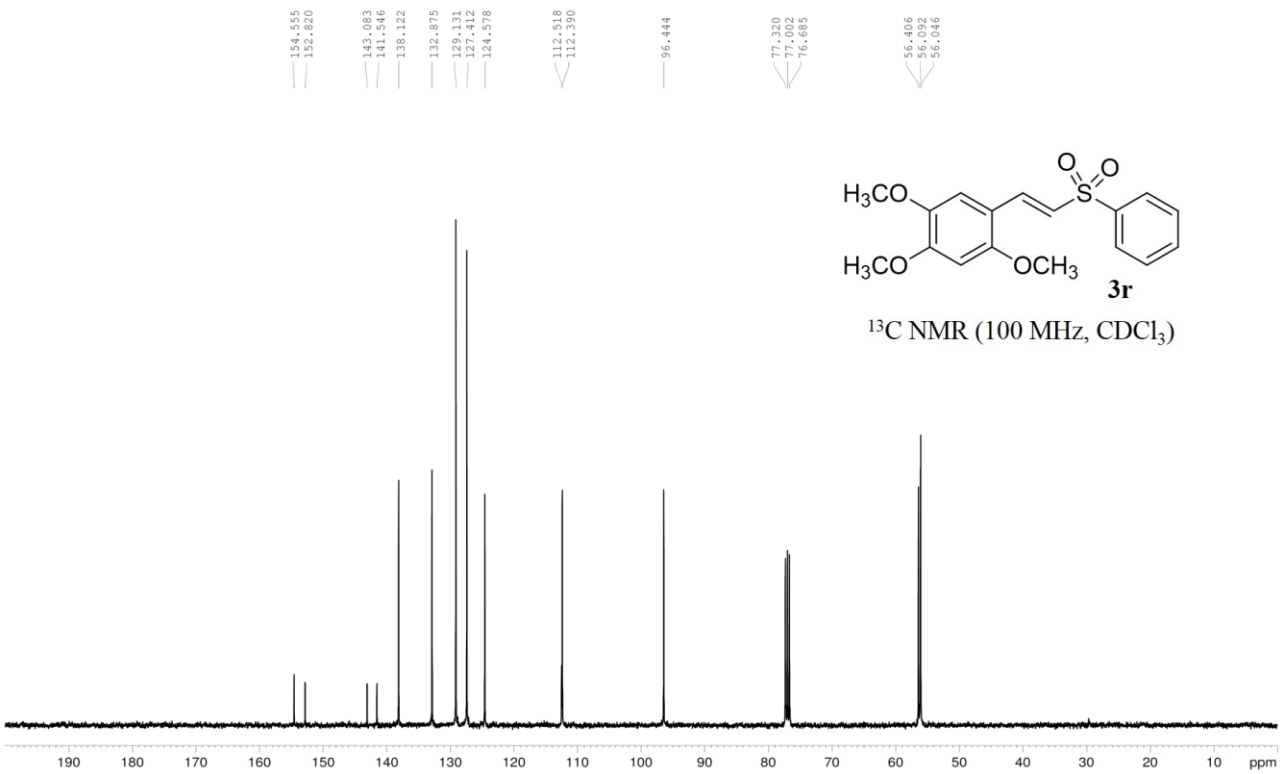



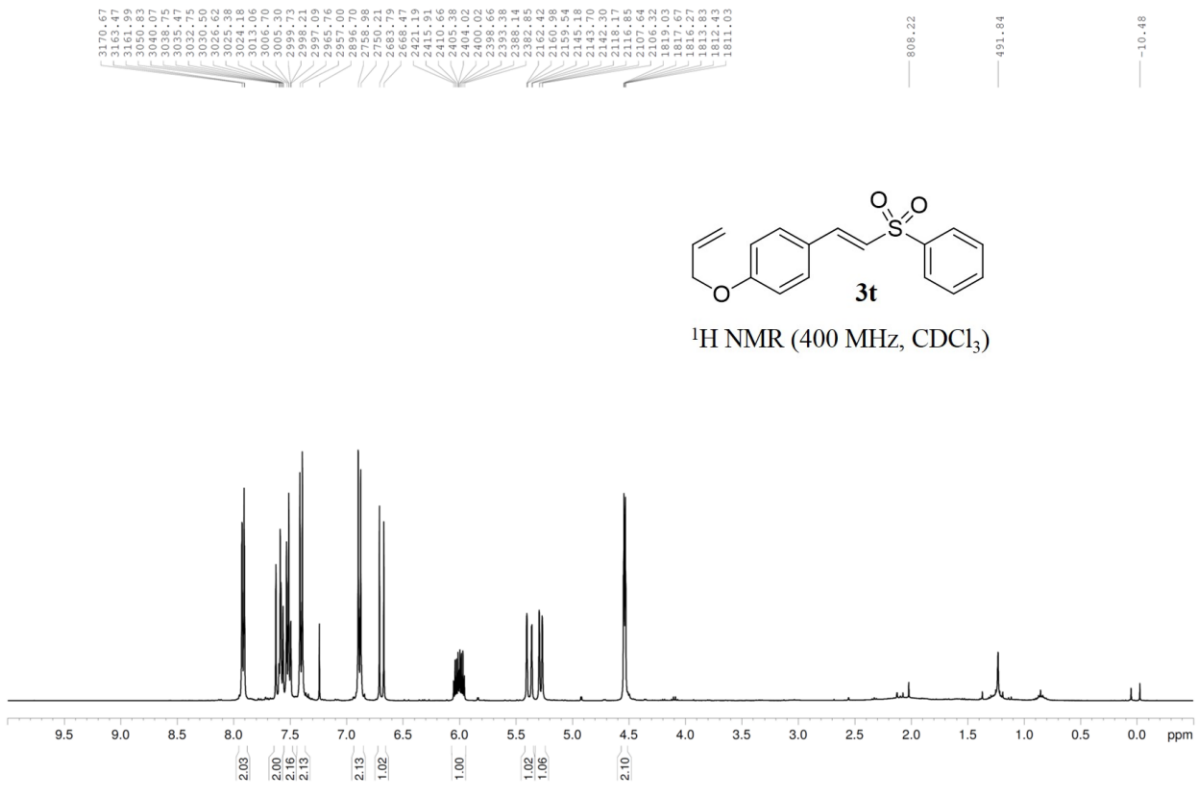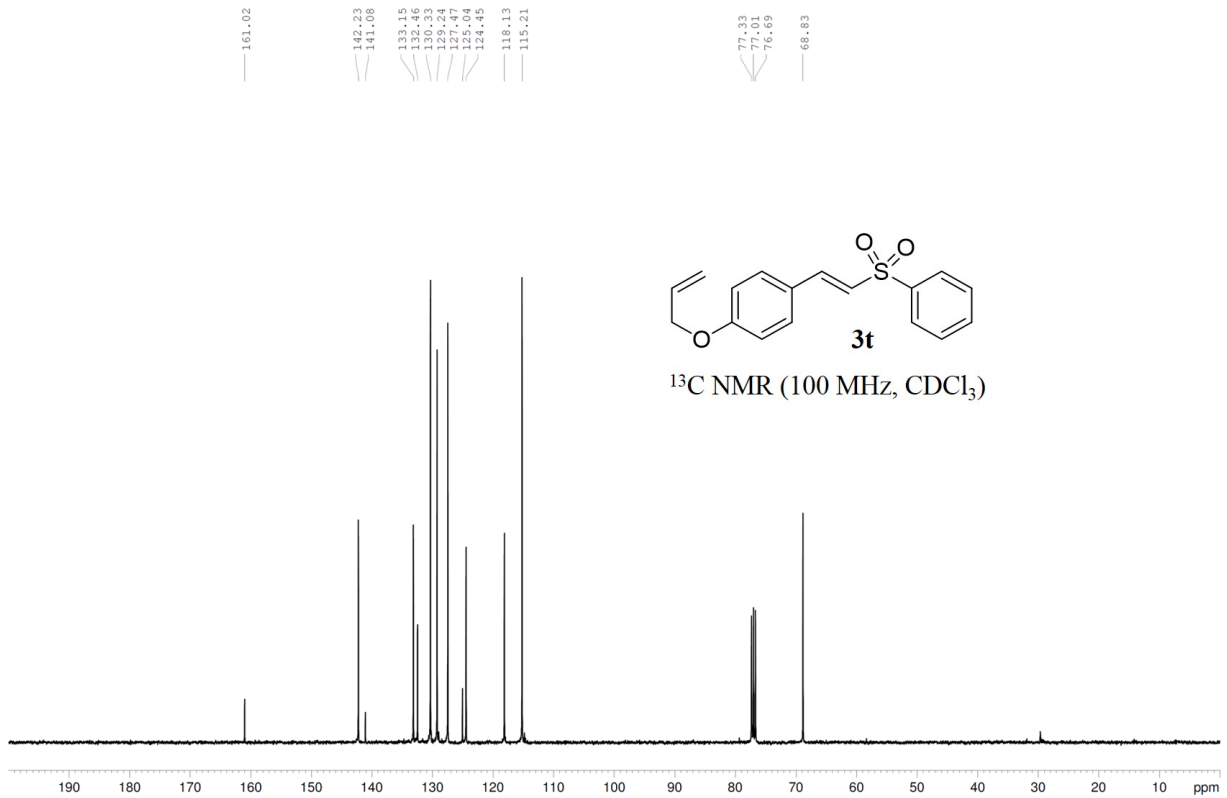

3194.398  
3187.196  
3185.955  
3167.709  
3140.701  
3138.460  
3131.217  
3125.296  
3116.493  
3050.671  
3043.469  
3041.148  
3036.027  
3024.983  
3017.020  
3008.658  
3004.976  
3001.255  
2999.295  
2994.053  
2896.661  
2790.307  
2774.982

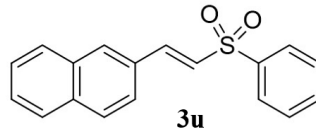

$^1\text{H NMR}$  (400 MHz,  $\text{CDCl}_3$ )

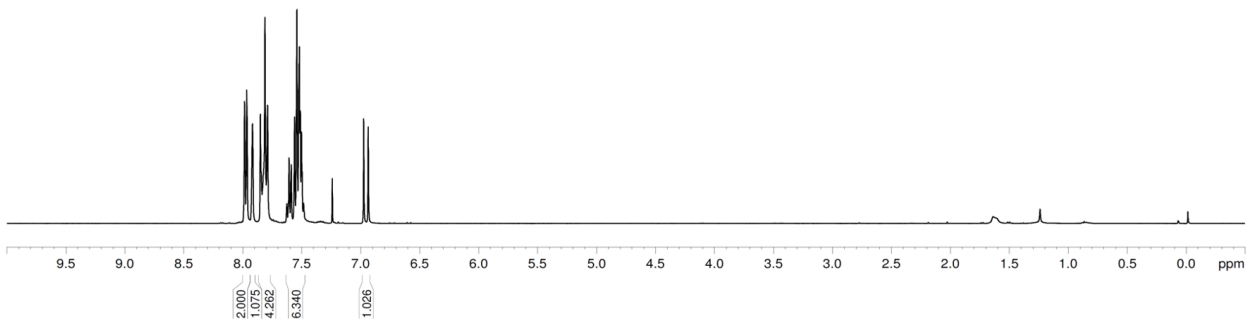

142.526  
140.803  
134.478  
133.343  
133.078  
130.908  
129.783  
129.525  
128.858  
128.655  
127.785  
127.645  
127.239  
126.969  
123.399

77.321  
77.004  
76.686

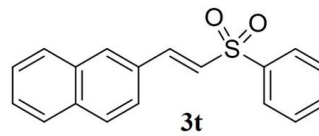

$^{13}\text{C NMR}$  (100 MHz,  $\text{CDCl}_3$ )

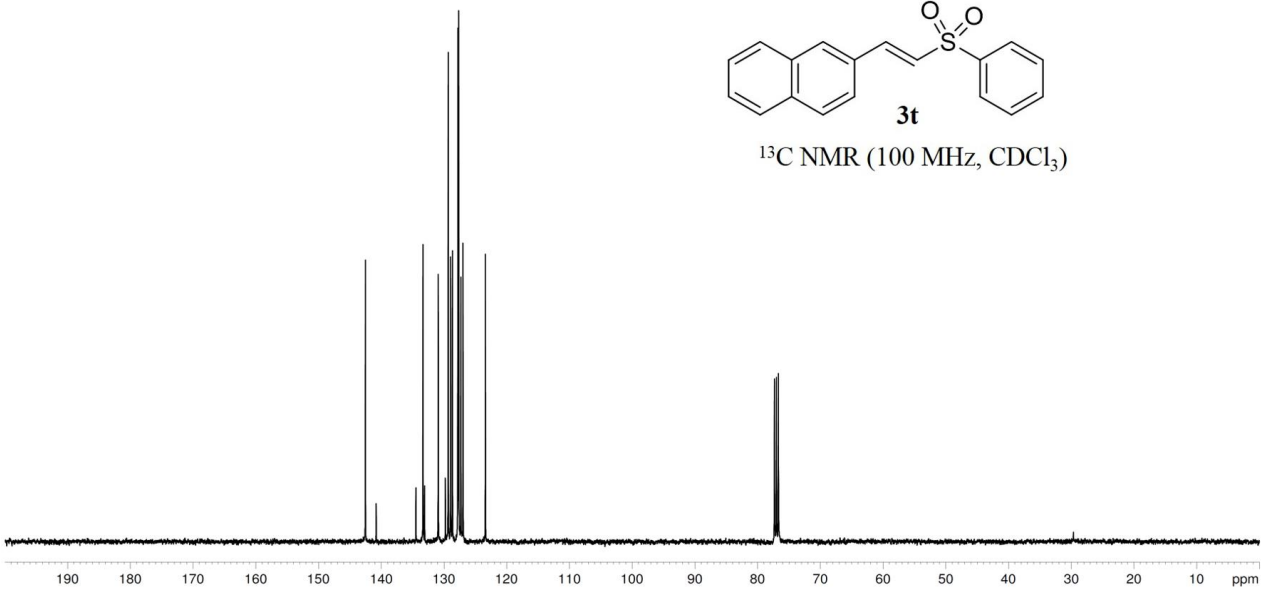

3155.51  
3155.11  
3155.67  
3045.27  
3037.51  
3035.71  
3030.54  
3017.10  
3009.34  
3003.74  
3003.74  
2981.05  
2975.61  
2973.93  
2969.46  
2955.36  
2946.00  
2943.32  
2941.32  
2941.32  
2929.71  
2923.51  
2896.70  
2797.67  
2797.67  
2718.80  
2707.80  
2703.28  
2692.67  
2666.19  
2666.19

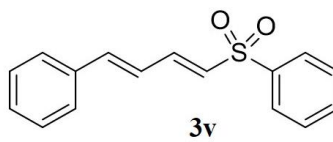

$^1\text{H NMR}$  (400 MHz,  $\text{CDCl}_3$ )

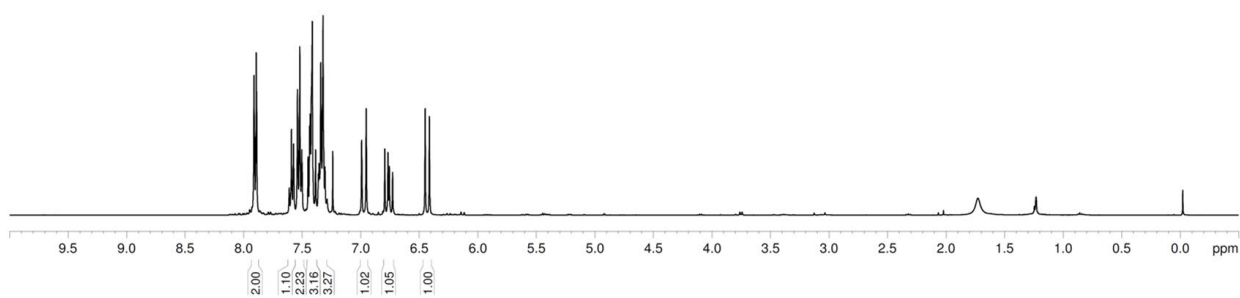

— 8.60

142.39  
142.39  
146.90  
146.90  
135.30  
129.65  
129.65  
128.87  
127.51  
127.51  
123.58  
123.58

77.32  
77.00  
76.69

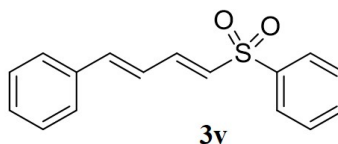

$^{13}\text{C NMR}$  (100 MHz,  $\text{CDCl}_3$ )

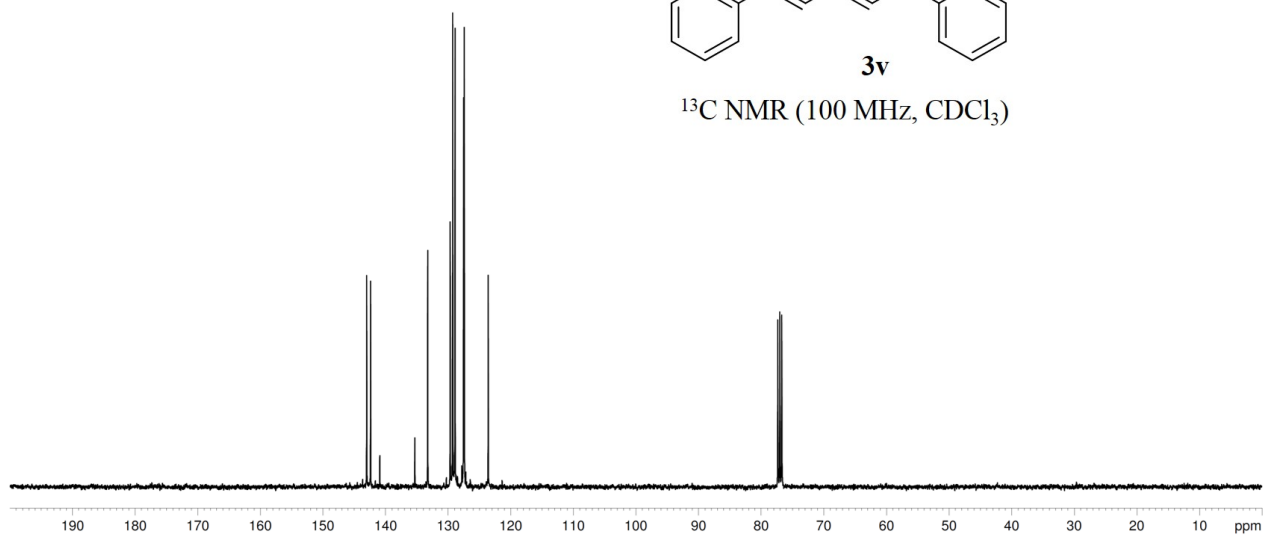



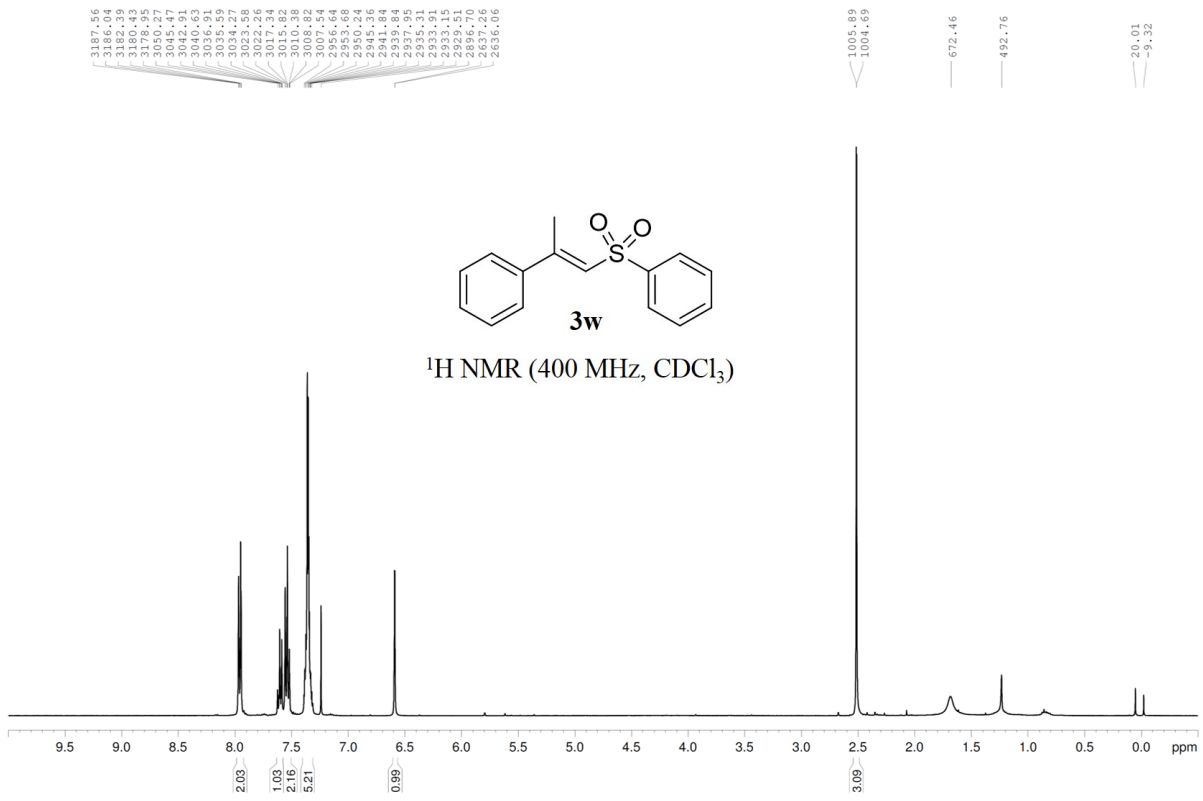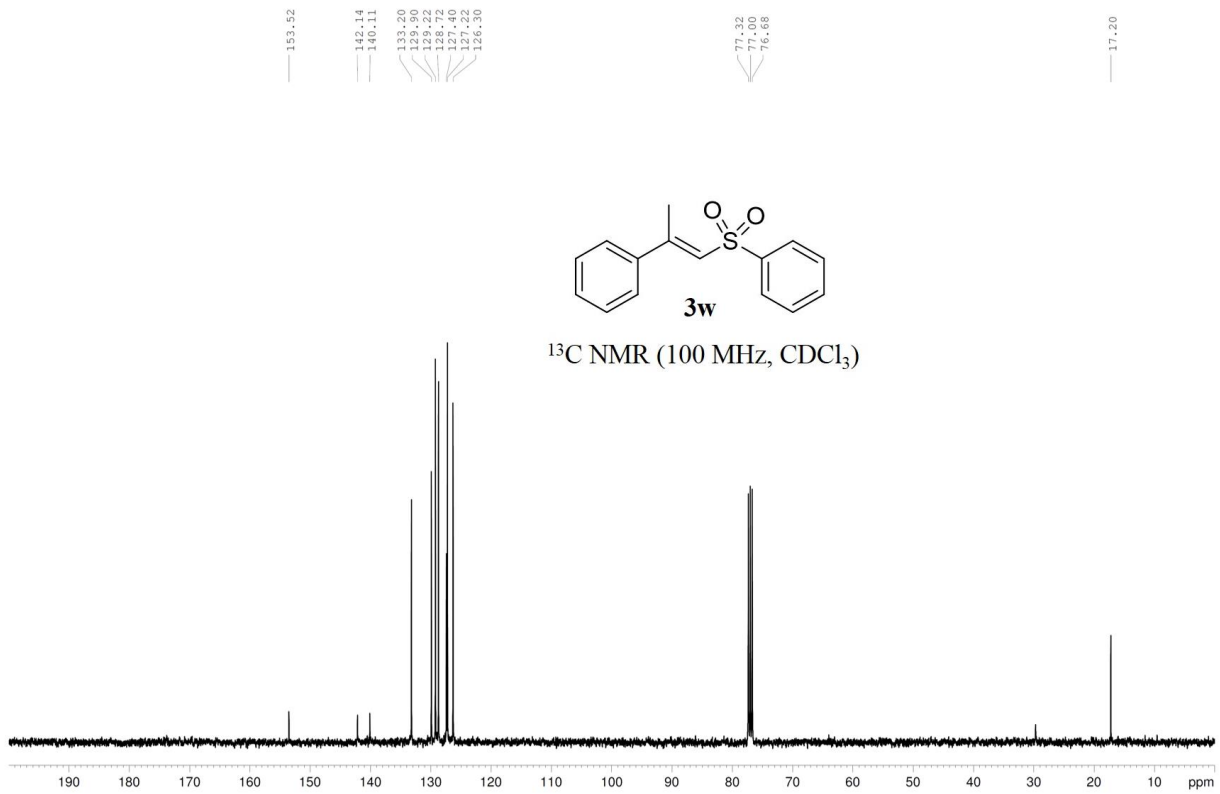

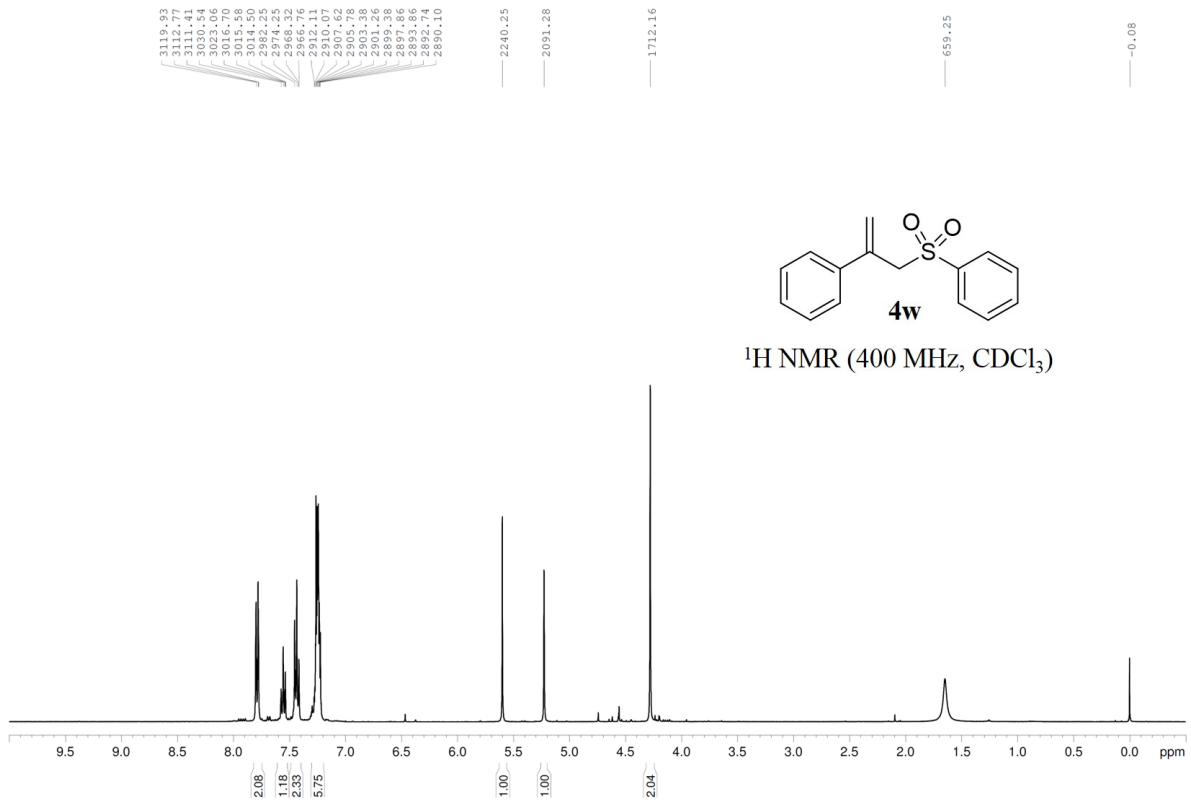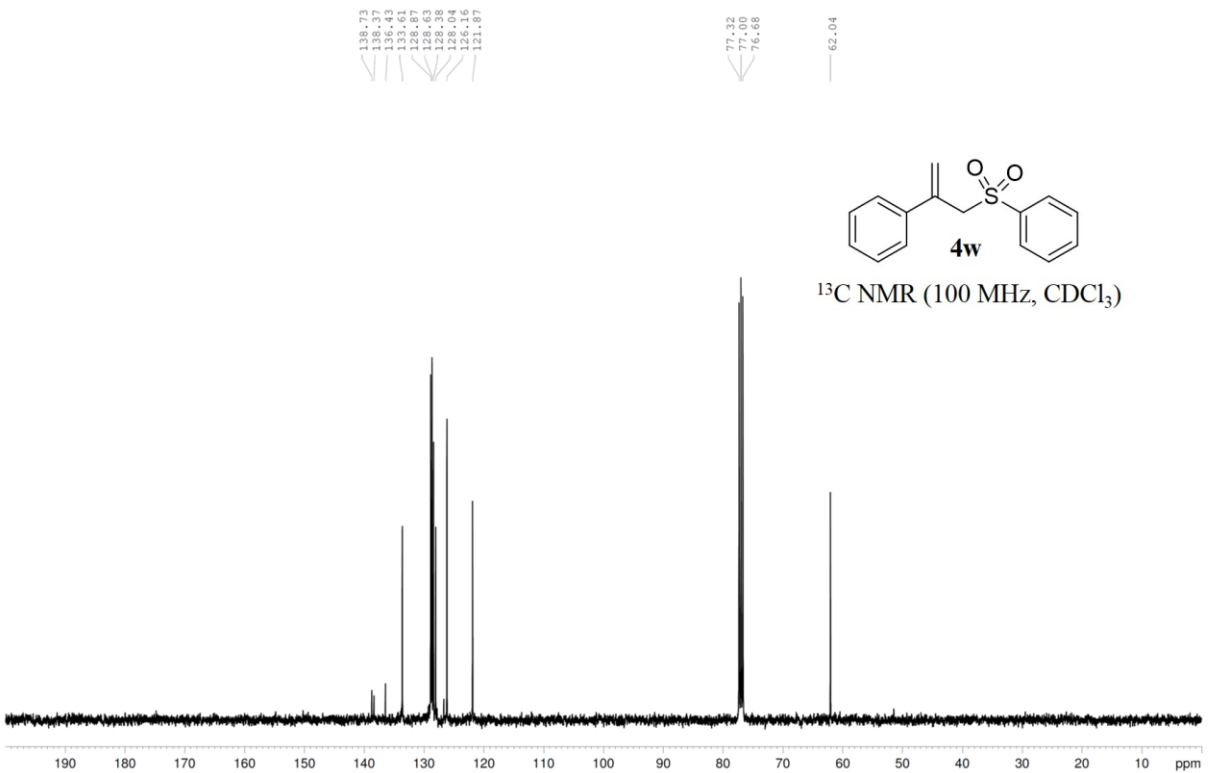

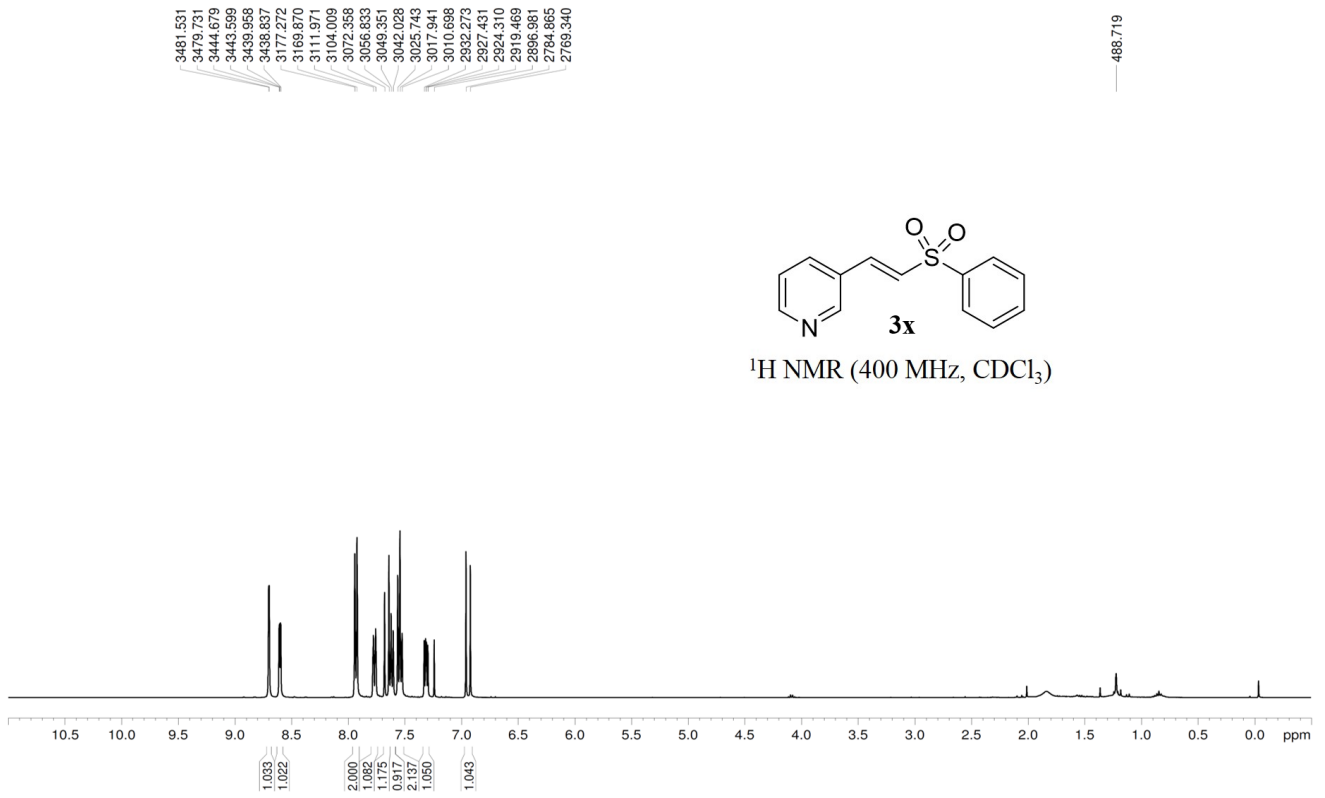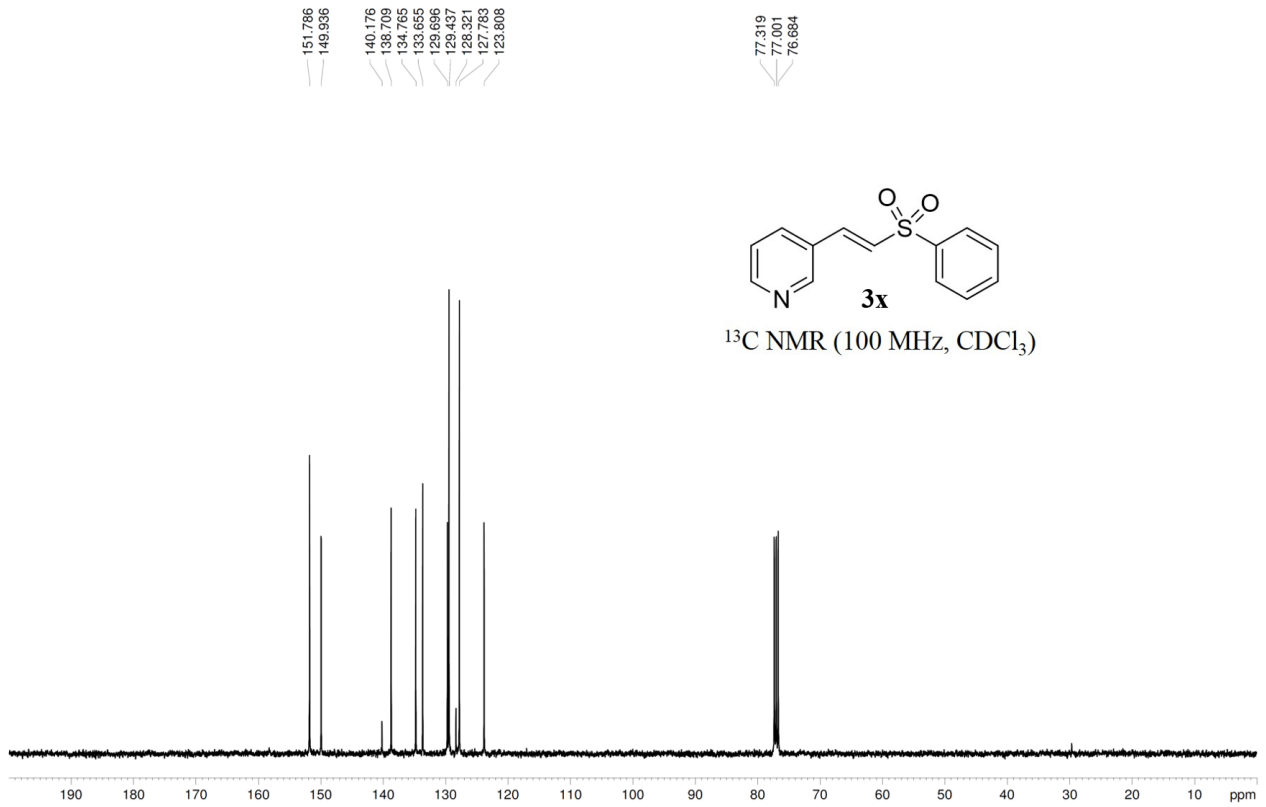

3438.317  
3433.876  
3181.954  
3174.512  
3096.206  
3084.526  
3088.484  
3086.843  
3080.801  
3079.121  
3062.235  
3047.390  
3041.868  
3034.546  
3019.101  
3011.298  
3004.056  
2980.569  
2965.644  
2961.362  
2953.640  
2916.908  
2911.786  
2909.465  
2904.624  
2896.901

650.491

-10.844

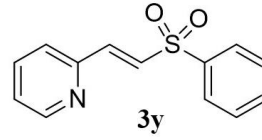

$^1\text{H NMR}$  (400 MHz,  $\text{CDCl}_3$ )

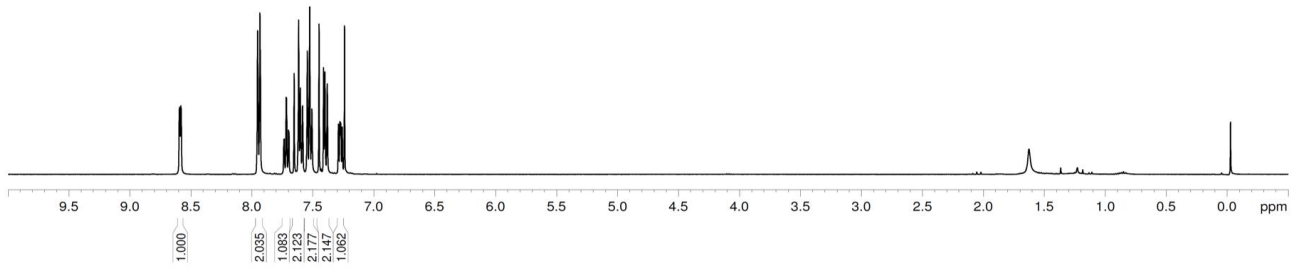

150.972  
150.295  
140.503  
140.190  
137.047  
133.536  
131.805  
129.340  
127.864  
125.481  
125.005

77.320  
77.002  
76.685

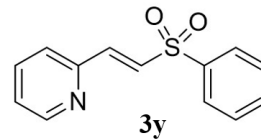

$^{13}\text{C NMR}$  (100 MHz,  $\text{CDCl}_3$ )

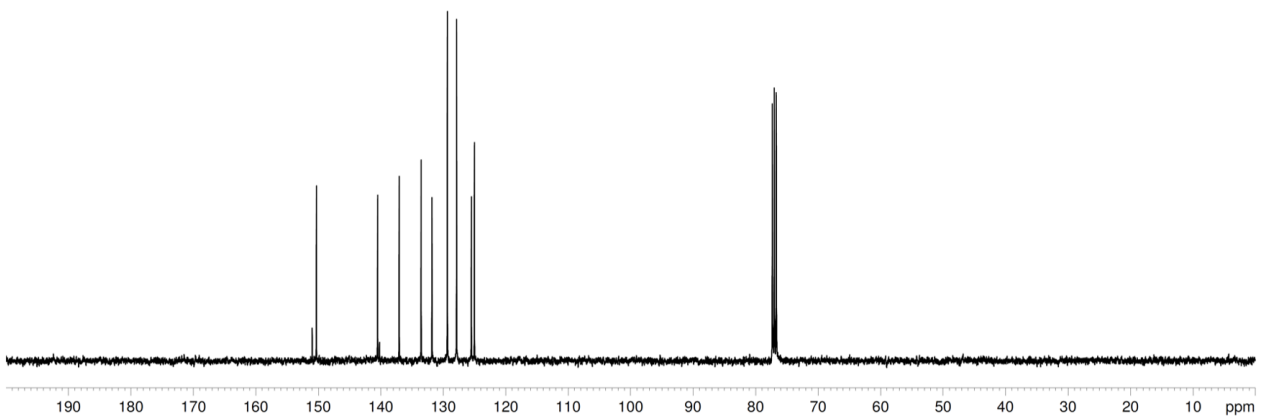

3165.709  
3156.226  
3156.866  
3042.349  
3034.986  
3032.865  
3027.664  
3013.659  
3005.857  
2998.734  
2981.969  
2980.929  
2974.847  
2959.802  
2896.981  
2895.356  
2680.311  
2675.269  
2671.828  
2365.680  
2364.080  
2582.479  
2580.719

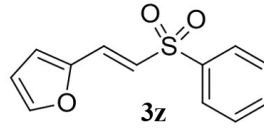

$^1\text{H NMR}$  (400 MHz,  $\text{CDCl}_3$ )

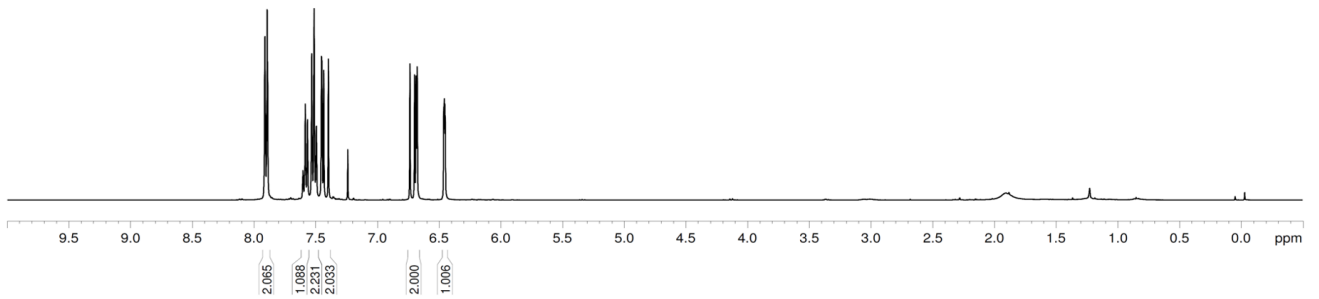

148.669  
145.631  
140.826  
133.270  
129.274  
128.867  
127.510  
124.682  
116.925  
112.560

77.319  
77.002  
76.684

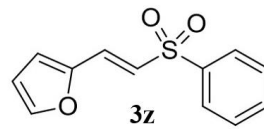

$^{13}\text{C NMR}$  (100 MHz,  $\text{CDCl}_3$ )

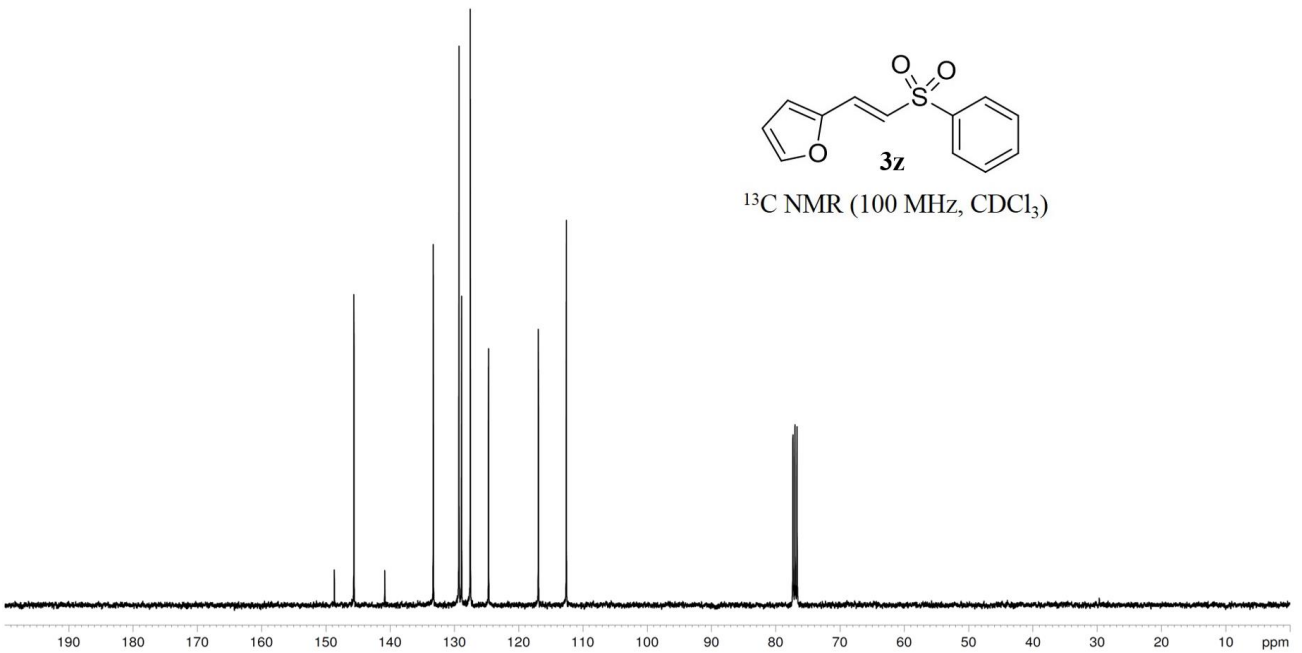

3169.030  
3161.787  
3160.347  
3117.213  
3102.088  
3045.630  
3044.429  
3040.708  
3038.267  
3036.107  
3032.105  
3030.905  
3029.664  
3017.060  
3010.498  
3009.258  
3003.656  
3002.136  
2967.164  
2962.082  
2917.508  
2913.947  
2896.781  
2881.077  
2817.355  
2816.035  
2812.314  
2657.183  
2642.059

491.440

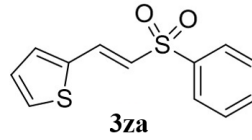

$^1\text{H NMR}$  (400 MHz,  $\text{CDCl}_3$ )

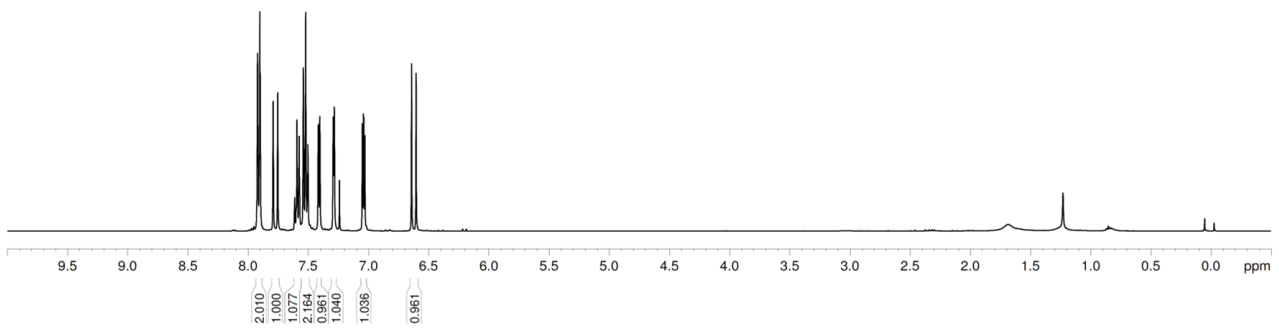

140.760  
136.880  
135.092  
133.312  
132.442  
129.997  
128.295  
127.524  
125.329

77.320  
77.002  
76.685

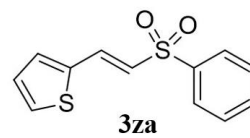

$^{13}\text{C NMR}$  (100 MHz,  $\text{CDCl}_3$ )

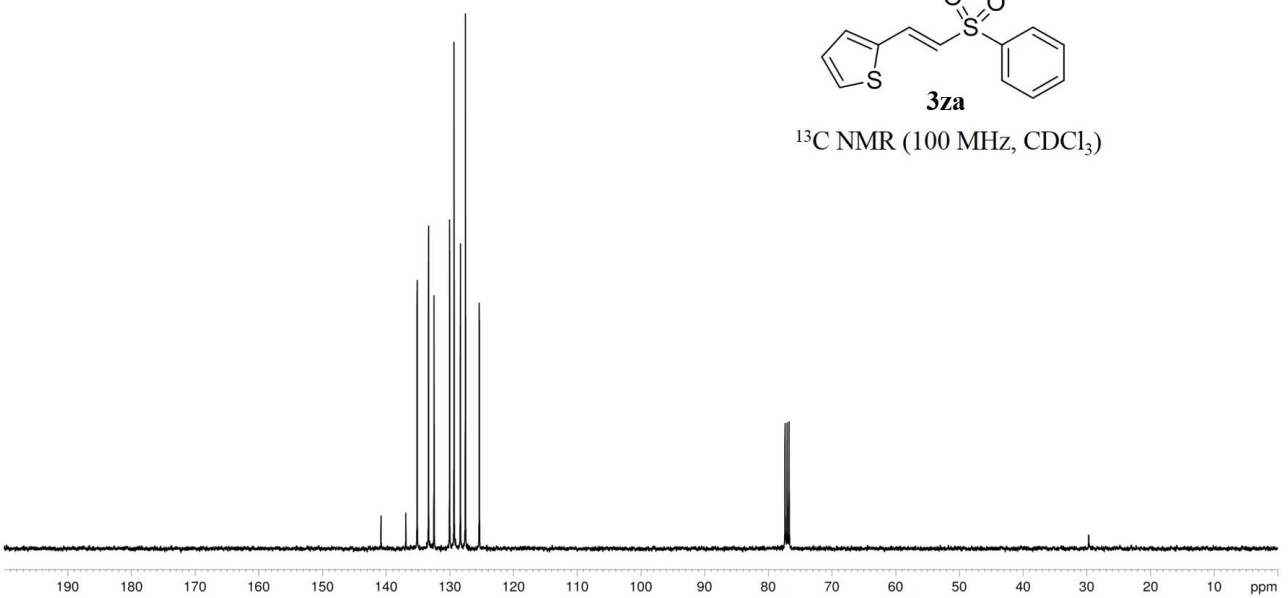

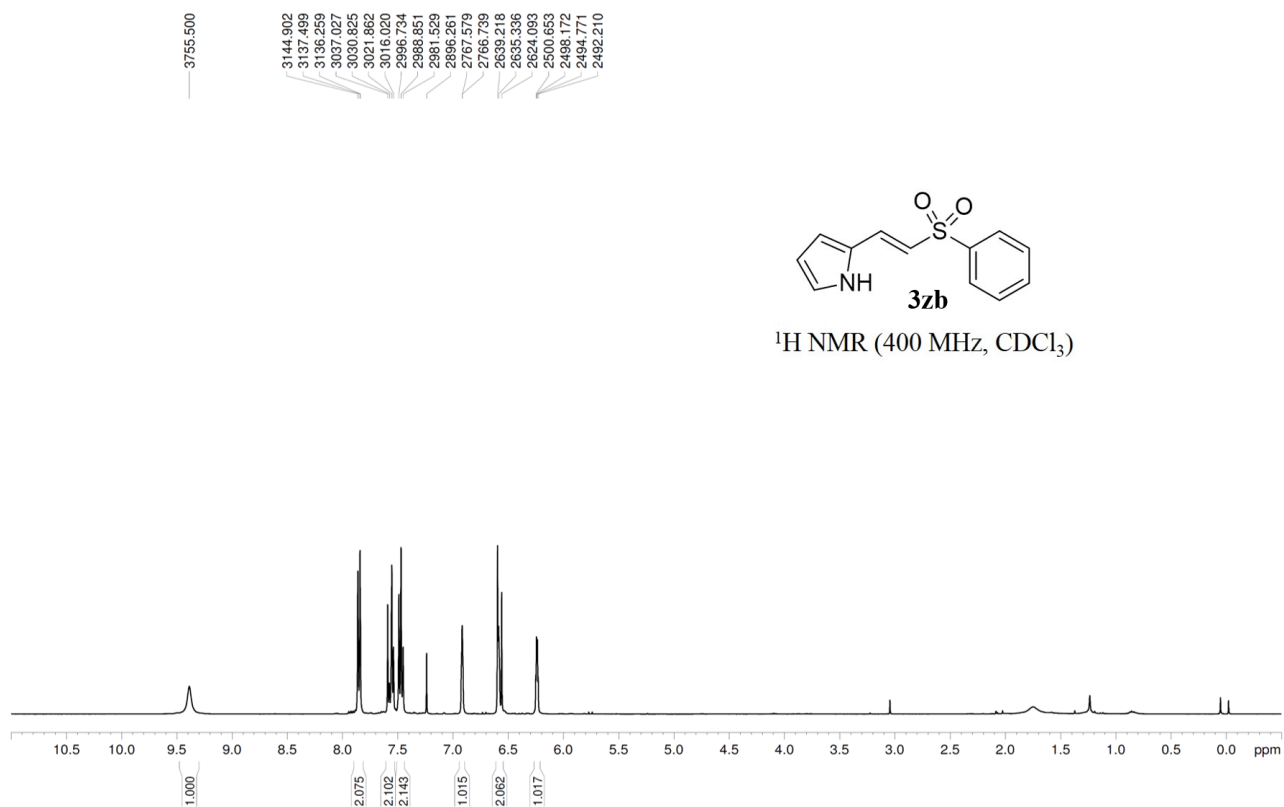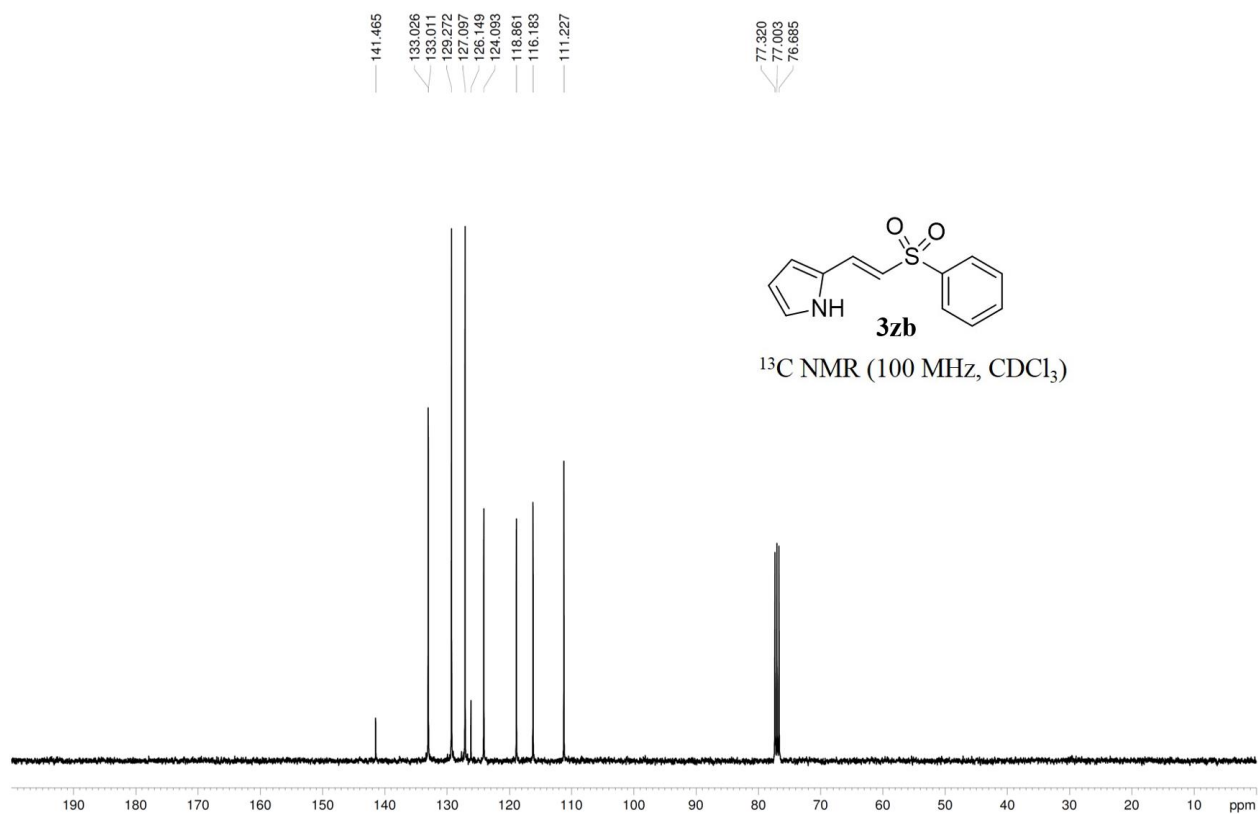

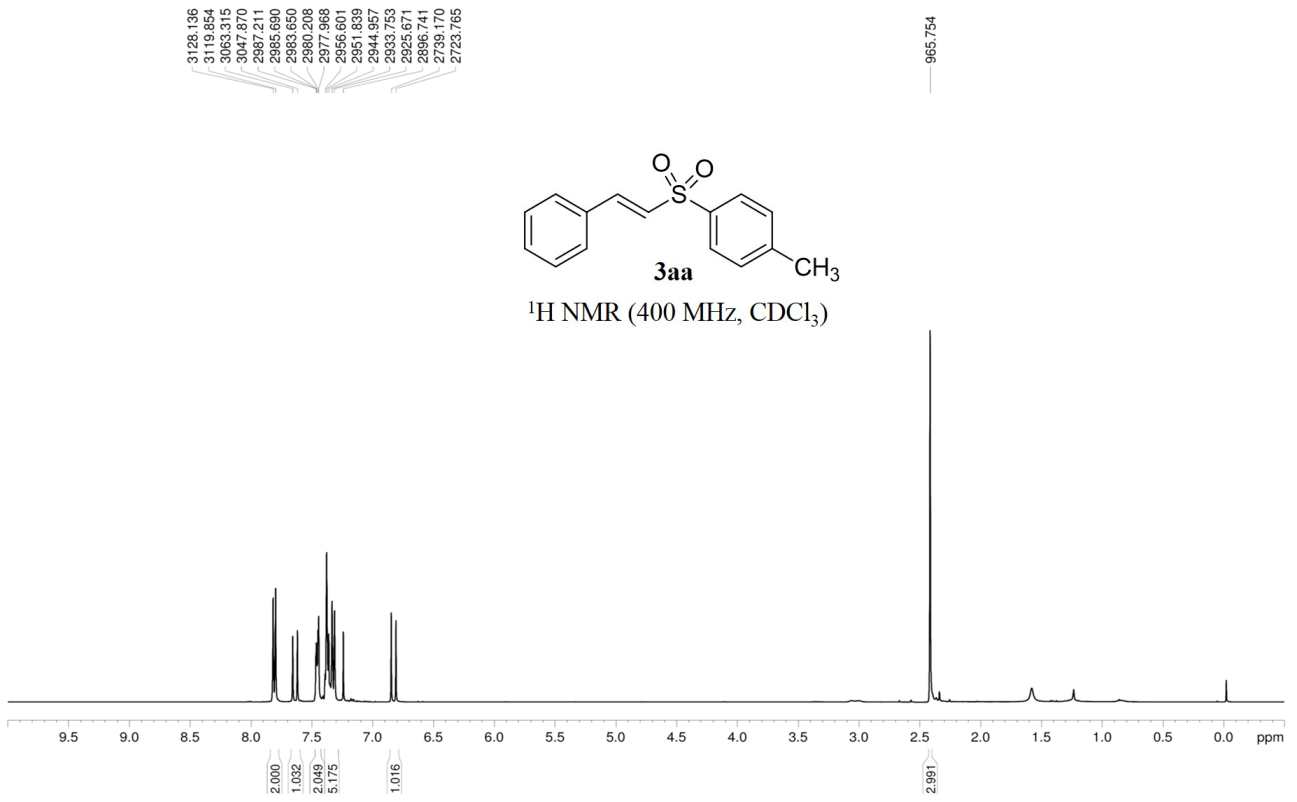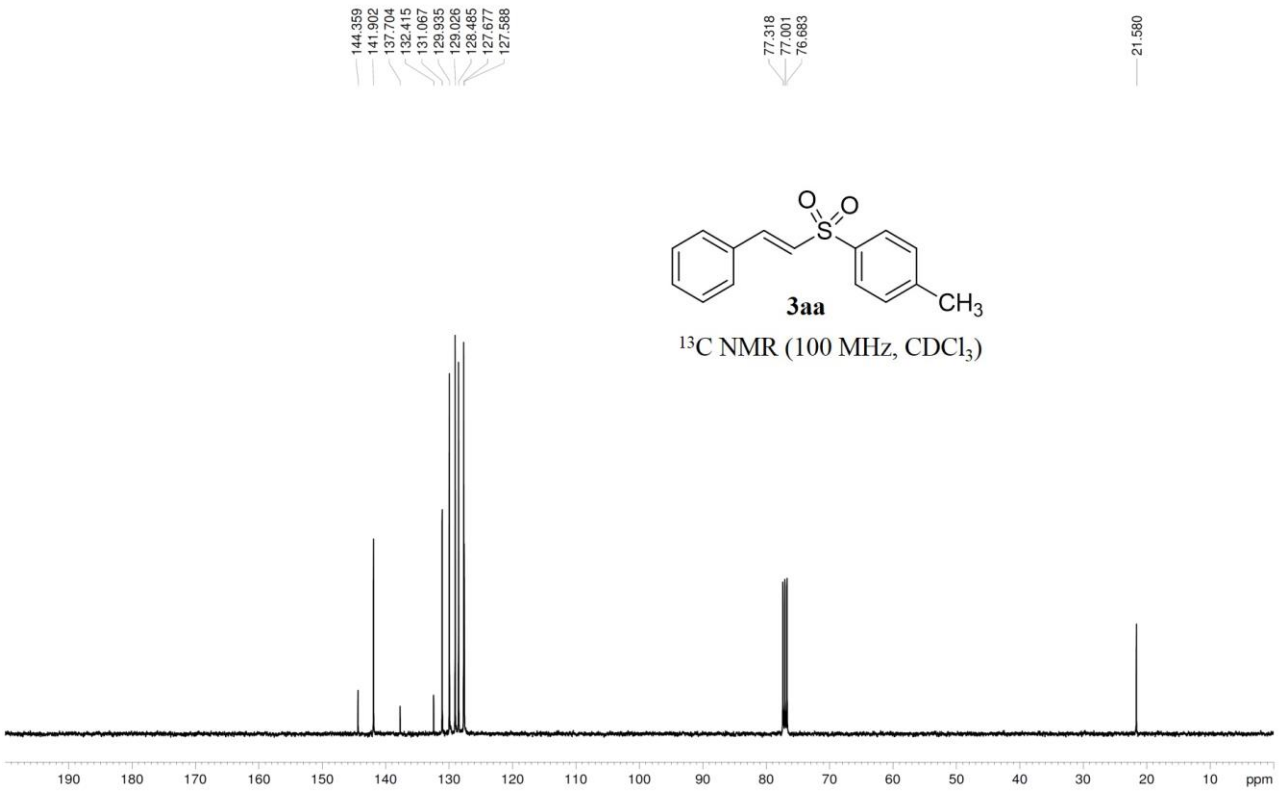



3150.744  
3148.943  
3142.141  
3139.780  
3076.320  
3060.915  
3004.736  
2996.134  
2991.812  
2990.532  
2984.530  
2982.649  
2972.766  
2971.005  
2965.484  
2958.561  
2950.919  
2944.757  
2942.116  
2887.301  
2736.009  
2720.604

493.200

-9.003

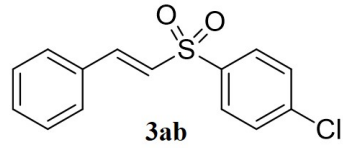

$^1\text{H NMR}$  (400 MHz,  $\text{CDCl}_3$ )

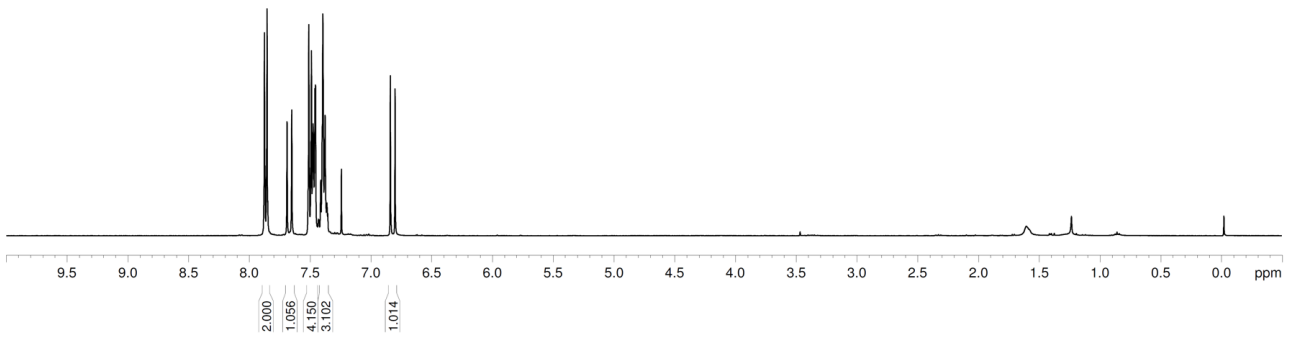

143.035  
140.078  
139.218  
132.144  
131.397  
129.643  
129.124  
128.614  
126.809

77.321  
77.003  
76.685

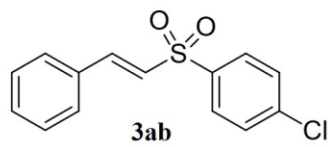

$^{13}\text{C NMR}$  (100 MHz,  $\text{CDCl}_3$ )

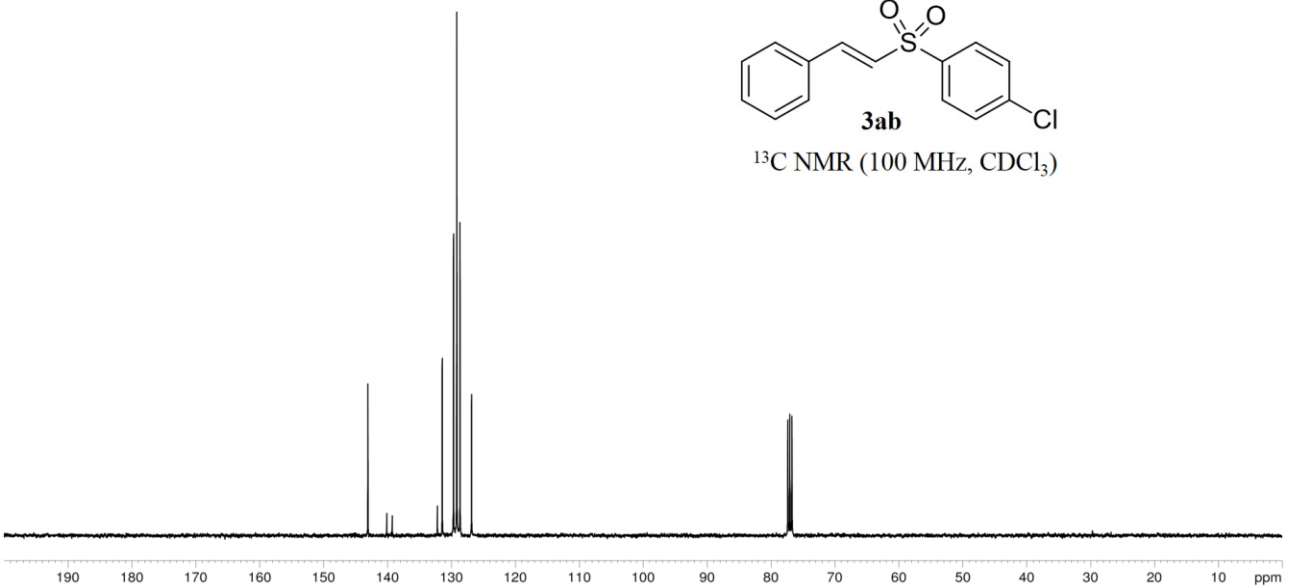

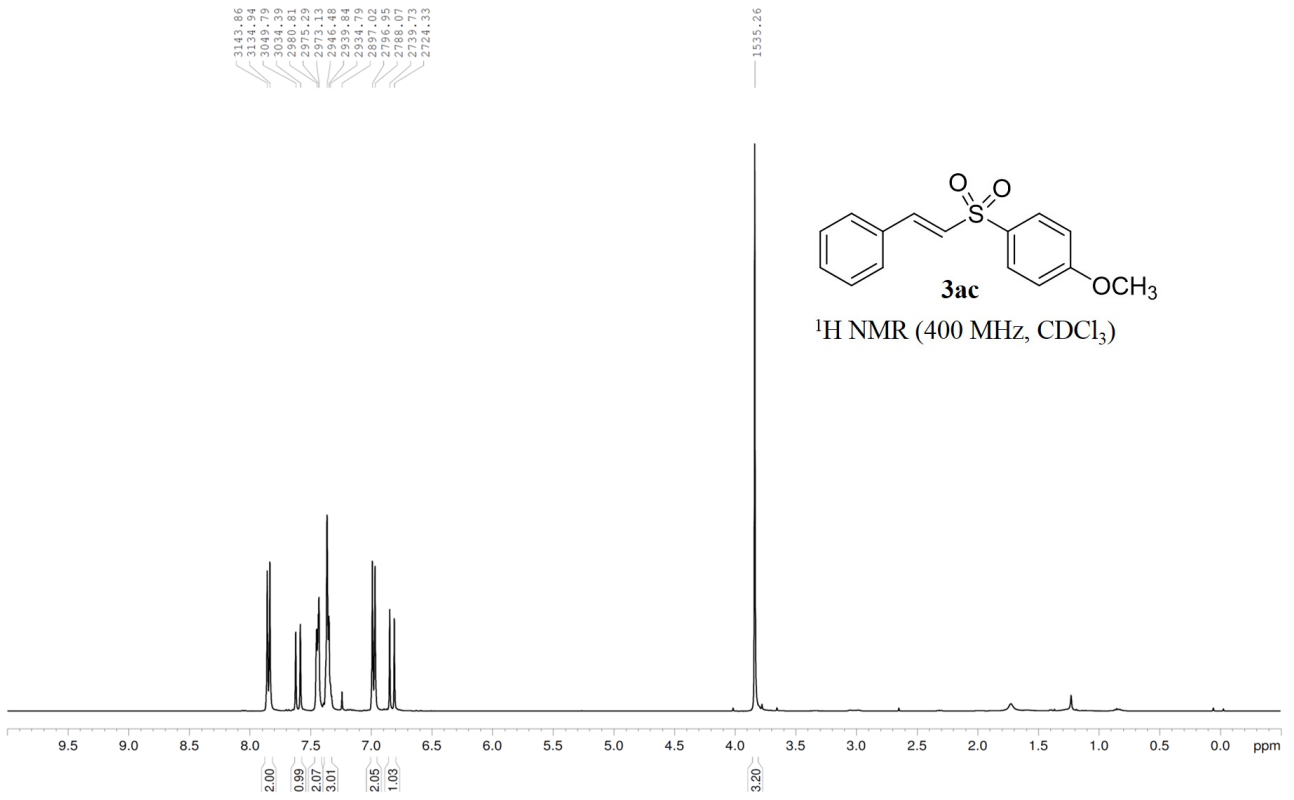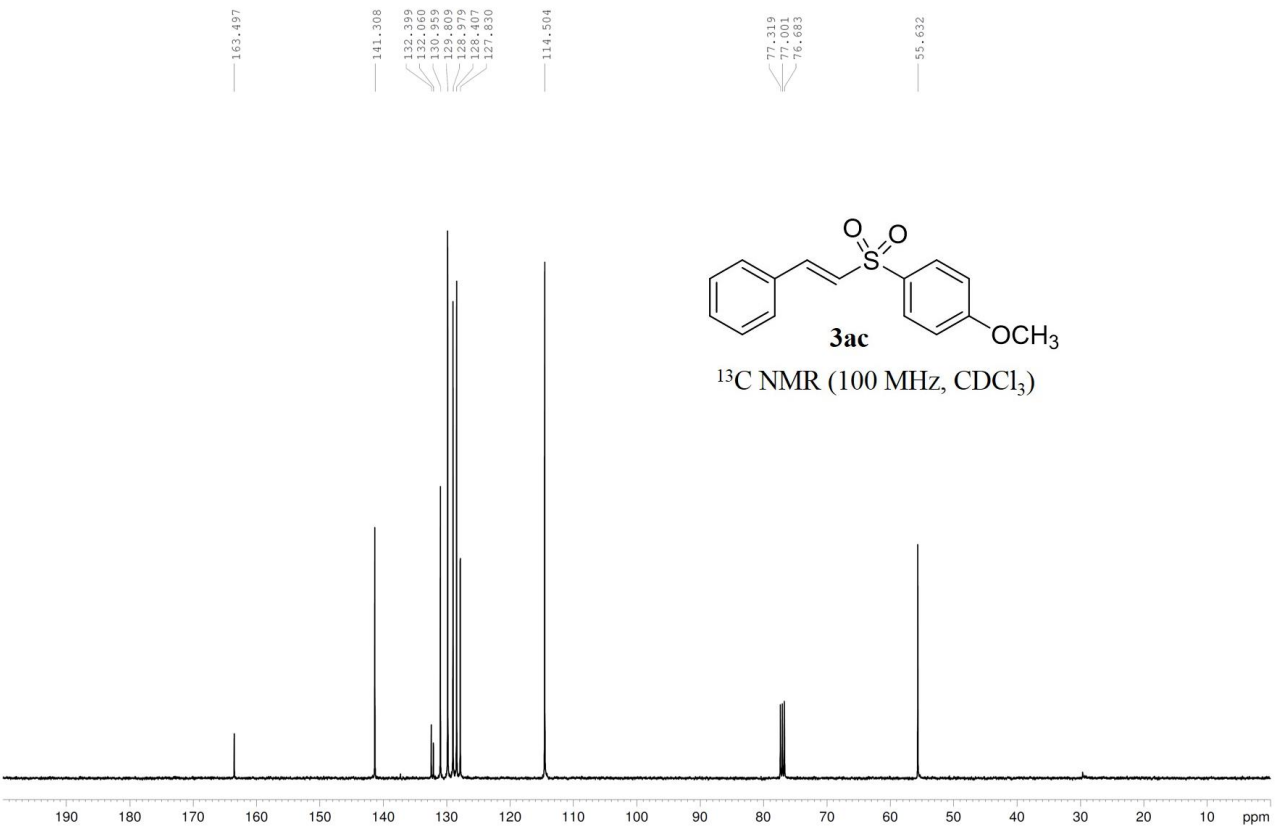

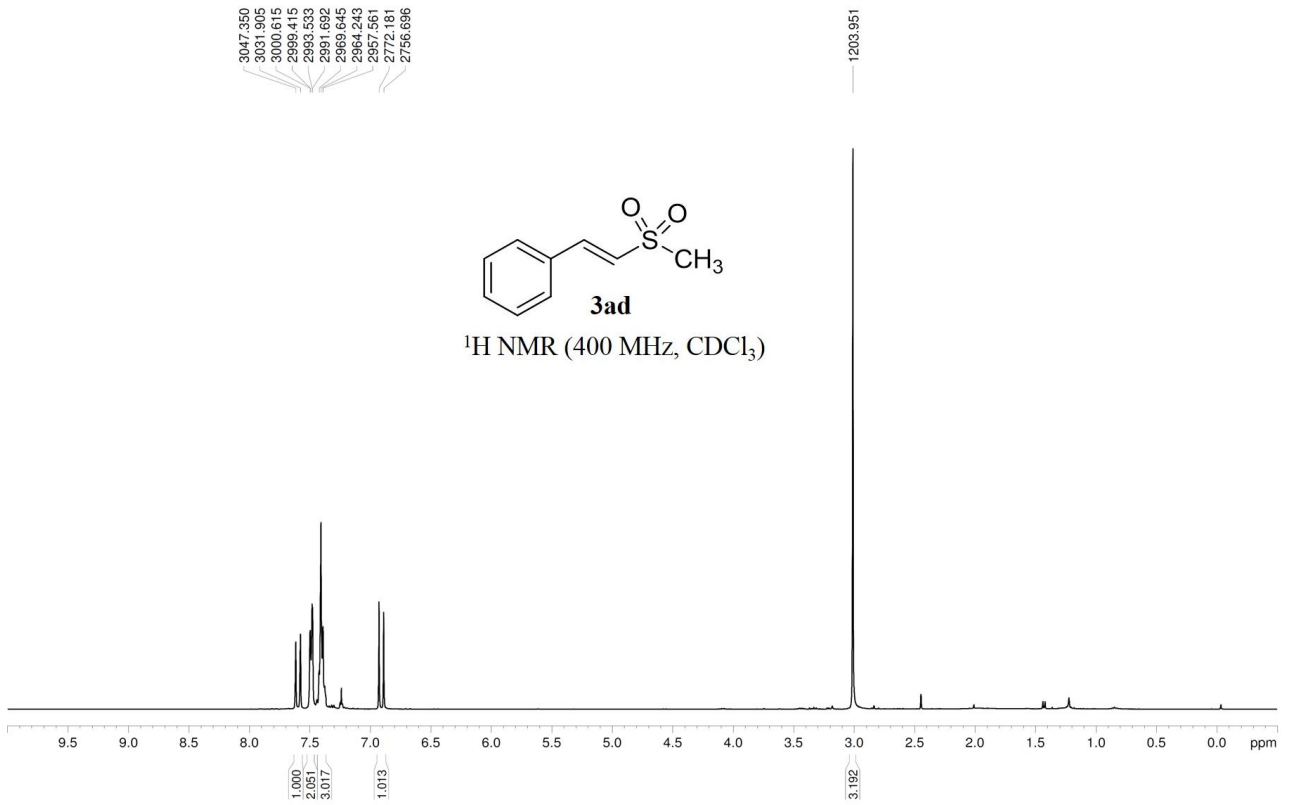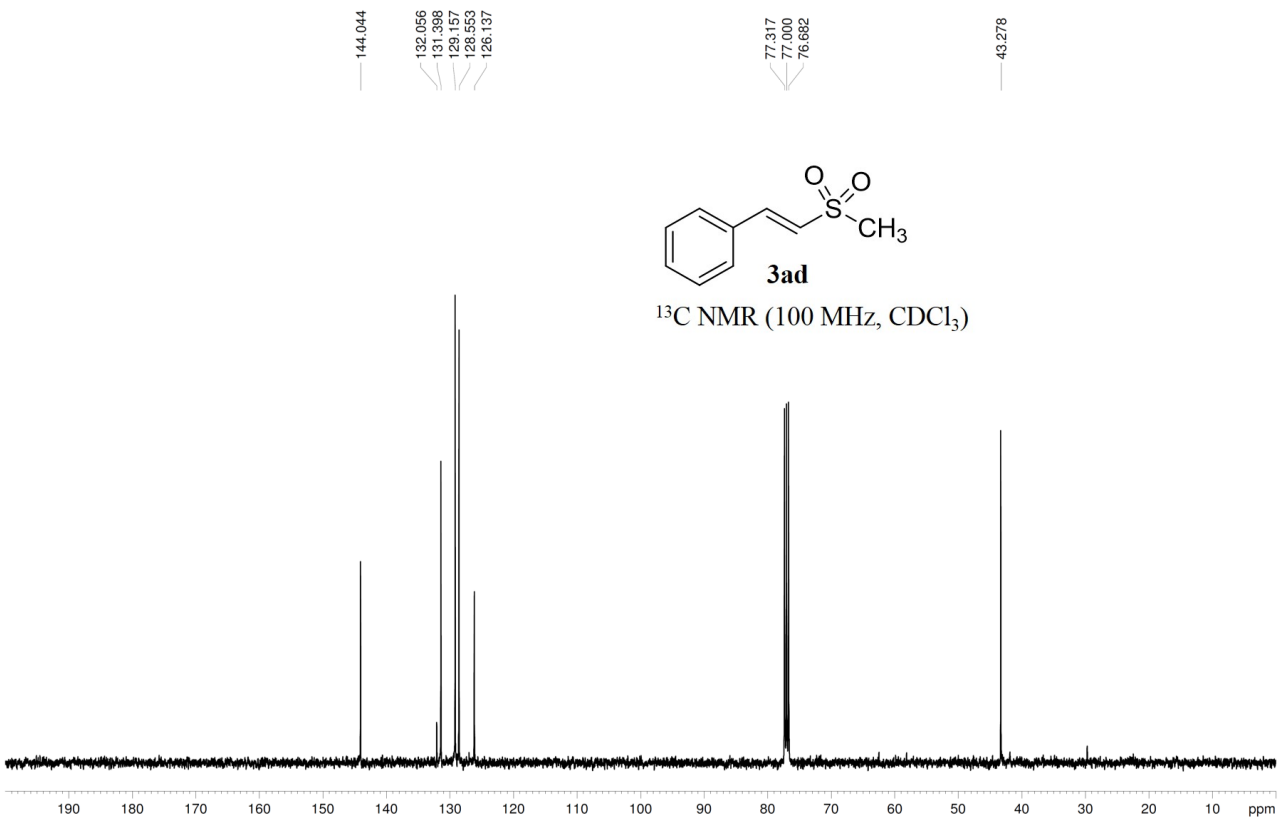

Supplement: c5ob00417a1.pdf [file c5ob00417a1.pdf]
